# Supplementary material for: 1D 13C-NMR Data as Molecular Descriptors in Spectra — Structure Relationship Analysis of Oligosaccharides
Source: Molecules. 2012 Mar 28;17(4):3818–33. doi: 10.3390/molecules17043818 (PMC6268221; doi:10.3390/molecules17043818)
Supplement: Supplementary file 1 [file molecules-17-03818-s001.xls]

## Sheet: Table of Contents
1D 13C NMR data as molecular descriptors in spectra–structure relationship analysis of oligosaccharides
Florbela Pereira*
REQUIMTE, Departamento de Química, Faculdade de Ciências e Tecnologia,
Universidade Nova de Lisboa, 2829-516 Caparica, Portugal.
*Corresponding author: tel.: (+351) 21 2948300; fax: (+351) 21 2948550; email:
florbela.pereira@fct.unl.pt
Table of contents:
TABLE S1. Data set, classification of the anomeric configurations, type of linkages, residues and chain type of 92 trisaccharides
and RF trisaccharide predictions for the training set in OOB estimation using 1D 13C NMR descriptors.
TABLE S2. Data set, classification of the anomeric configurations, type of linkages, residues and chain type of 27 trisaccharides
and RF trisaccharide predictions for the test set using 1D 13C NMR descriptors.
TABLE S3. Data set, classification of the anomeric configurations, type of linkages, residues and chain type of 204 di- and trisaccharides
and RF di- and trisaccharide predictions for the training set in OOB estimation using 1D 13C NMR descriptors.
TABLE S4. Data set, classification of the anomeric configurations, type of linkages, residues and chain type of 69 di- and trisaccharides
and RF di- and trisaccharide predictions for the test set using 1D 13C NMR descriptors.

## Sheet: TABLE S1 
TABLE S1. Data set, classification of the anomeric configurations, type of linkages, residues and chain type of 92 trisaccharides
	and RF trisaccharide predictions for the training set in OOB estimation using 1D 13C NMR descriptors.
		Spectral 13C NMR descriptors																							Classification									RF OOB trisaccharides predictions
ID	Chemical name	C1	C2	C3	C4	C5	C6	C7	C8	C9	C10	C11	C12	C13	C14	C15	C16	C17	C18	C19	C20	C21	C22	C23	Ano_F	Ano_S	Ano_R	F_Link	S_Link	Red_end	M_residue	F_Residue	Chain_Type	Ano_F	Ano_S	Ano_R	F_Link	S_Link	Red_end	M_residue	F_Residue	Chain_Type	References
113	Methyl a-D-mannopyranosyl-(1→2)-[b-D-galactopyranosyl-(1→3)]-b-D-glucopyranoside	0	0	0	0	58.2	62.3	62.3	62.3	68.1	69.9	70.2	71.4	71.6	72.6	74.2	74.3	76.5	76.7	77.6	83.9	100.6	104	104.7	A	B	B	A	B	A	B	C	B	B	B	B	A	B	A	C	B	B	[20]
114	Methyl b-D-galactopyranosyl-(1→2)-[b-D-galactopyranosyl-(1→3)]-b-D-glucopyranoside	0	0	0	0	58.2	62.1	62.2	62.2	69.9	70	70	72.6	72.9	74.1	74.2	76.4	76.6	76.6	80.4	85.9	103.5	104	104.1	B	B	B	A	B	A	B	B	B	B	B	B	A	B	A	A	A	B	[20]
115	Methyl b-D-galactopyranosyl-(1→2)-[b-D-mannopyranosyl-(1→3)]-b-D-glucopyranoside	0	0	0	0	58.3	62	62	62.3	68.2	69.9	71.4	71.4	71.7	72.8	74.3	74.4	76.4	76.6	79.7	81.3	101.2	103.7	103.7	B	B	B	A	B	A	C	B	B	A	B	B	A	B	A	A	C	B	[20]
116	Methyl a-L-rhamnopyranosyl-(1→2)-[a-D-mannopyranosyl-(1→3)]-b-D-glucopyranoside	0	0	0	0	17.9	58.6	62.3	62.7	68.2	70.4	71.6	71.7	71.9	71.9	71.9	73.5	75.2	77	80.4	83.2	102.2	102.9	103.7	A	A	B	A	B	A	C	D	B	B	A	B	A	B	A	C	C	B	[20]
117	Methyl b-L-fucopyranosyl-(1→2)-[a-D-mannopyranosyl-(1→3)]-b-D-glucopyranoside	0	0	0	0	16.9	58.7	61.8	62.2	68.4	71.2	71.5	71.5	72.2	72.4	72.9	73.3	74.1	76.8	77.9	77.9	100.6	103.5	105.1	B	A	B	A	B	A	C	E	B	B	B	B	A	C	A	A	C	B	[20]
118	Methyl a-D-mannopyranosyl-(1→2)-[a-L-fucopyranosyl-(1→3)]-b-D-glucopyranoside	0	0	0	0	16.5	58.2	62.3	62.4	68.2	68.2	69.4	70.1	70.9	71.6	71.6	73.2	75	76.8	80.3	81.6	100	101.5	104.5	A	A	B	A	B	A	E	C	B	A	A	A	A	C	A	C	C	B	[20]
119	Methyl b-L-fucopyranosyl-(1→2)-[a-L-rhamnopyranosyl-(1→3)]-b-D-glucopyranoside	0	0	0	0	16.7	17.7	58.6	62.2	69.8	70	71.4	71.6	71.9	72.4	72.8	73.4	74.1	77	81.1	81.4	102.2	104.1	104.7	B	A	B	A	B	A	D	E	B	B	B	B	A	B	A	E	E	B	[20]
120	Methyl a-D-mannopyranosyl-(1→2)-[b-L-fucopyranosyl-(1→3)]-b-D-glucopyranoside	0	0	0	0	17	58.5	62.1	62.4	68.6	71.4	71.6	71.8	71.8	72.8	73	73.5	74.4	75.2	76.9	81.3	100	104.4	105.4	A	B	B	A	B	A	E	C	B	B	A	B	A	B	A	C	D	B	[20]
121	Methyl a-L-fucopyranosyl-(1→2)-[b-L-fucopyranosyl-(1→3)]-b-D-glucopyranoside	0	0	0	0	16.4	16.5	58.3	62	68.1	70	71.3	71.4	72.4	72.4	72.6	73.1	74.3	76.5	80.3	83.7	101.5	103.8	104.4	A	B	B	A	B	A	E	E	B	B	B	B	A	B	A	E	E	B	[20]
122	Methyl b-L-fucopyranosyl-(1→2)-[b-L-fucopyranosyl-(1→3)]-b-D-glucopyranoside	0	0	0	0	16.6	16.7	58.3	62.2	70.9	71.4	72.1	72.2	72.5	72.6	72.6	74.2	74.2	76.6	77.6	80.1	102.3	102.5	104.8	B	B	B	A	B	A	E	E	B	B	B	B	A	B	A	E	E	B	[20]
123	Methyl a-L-fucopyranosyl-(1→2)-[a-L-fucopyranosyl-(1→3)]-b-D-glucopyranoside	0	0	0	0	16.3	16.3	58.1	62.2	68	68.3	69.4	69.5	70	70.8	70.8	73	73.1	76.5	80.9	85	100.4	100.6	103.6	A	A	B	A	B	A	E	E	B	A	A	A	A	C	E	E	E	B	[20]
124	Methyl b-L-fucopyranosyl-(1→2)-[b-L-fucopyranosyl-(1→3)]-a-D-glucopyranoside	0	0	0	0	16.6	16.6	56.1	61.9	70.7	71.1	71.9	72.5	72.5	72.5	72.5	72.5	74.1	74.1	74.8	79.6	99.3	102.3	103.6	B	B	A	A	B	A	E	E	B	B	B	B	B	C	B	E	E	B	[20]
125	Methyl a-L-fucopyranosyl-(1→2)-[b-L-fucopyranosyl-(1→3)]-b-D-galactopyranoside	0	0	0	0	16.4	16.5	58.3	62.2	67.1	68.1	70	71.2	71.8	72.5	72.5	73.2	74.3	75.7	77.6	80.7	101.5	101.5	104.1	A	B	B	A	B	B	E	E	B	A	A	B	A	C	D	E	E	B	[20]
126	Methyl b-L-fucopyranosyl-(1→2)-[b-L-fucopyranosyl-(1→3)]-b-D-galactopyranoside	0	0	0	0	16.7	16.7	58.4	62.2	67.9	71.1	72.1	72.5	72.5	72.6	72.6	74.1	74.1	75.7	76.3	76.7	101	103	105.2	B	B	B	A	B	B	E	E	B	B	B	B	A	B	A	E	E	B	[20]
127	O-b-D-Mannopyranosyl-(1→4)-O-b-D-mannopyranosyl-(1→4)-b-D-mannose	0	0	0	0	0	62	62	62.4	68.2	71.4	71.9	71.9	73	73	74.3	76.5	76.5	77.9	77.9	77.9	95.2	101.6	101.6	B	B	B	C	C	C	C	C	A	B	B	A	C	C	A	A	C	A	[21]
128	O-b-D-Mannopyranosyl-(1→4)-O-b-D-mannopyranosyl-(1→4)-a-D-glucose	0	0	0	0	0	62	62	62.4	68.4	71.5	71.5	72	72	73	73	74.3	76.5	77.9	77.9	80.6	93.4	101.5	101.7	B	B	A	C	C	A	C	C	A	B	B	B	C	C	C	A	C	A	[21]
129	O-b-D-Mannopyranosyl-(1→4)-O-b-D-glucopyranosyl-(1→4)-a-D-mannose	0	0	0	0	0	62	62	62.4	68.1	70.7	71.6	72	72.4	74.2	74.2	76	77	77	78.4	80.6	95.3	101.6	104.2	B	B	A	C	C	C	A	C	A	B	B	B	C	C	C	A	C	A	[21]
130	O-b-D-Mannopyranosyl-(1→4)-O-b-D-glucopyranosyl-(1→4)-b-D-mannose	0	0	0	0	0	62	62	62.4	68.1	72	72	73.6	74.2	74.2	76	76	77	77	78.4	80.6	95.3	101.6	104.2	B	B	B	C	C	C	A	C	A	B	B	B	C	C	C	A	C	A	[21]
131	Methyl a-D-glucopyranosyl-(1→3)-[b-D-glucopyranosyl-(1→4)]-a-D-galactopyranoside	0	0	0	0	56.03	61.6	61.71	61.99	67.84	70.66	70.92	71.05	72.57	72.6	74.01	74.39	74.69	75.66	76.62	76.85	96.43	100.49	103.58	A	B	A	B	C	B	A	A	B	B	A	B	A	C	C	A	C	B	[22]
132	Methyl b-D-glucopyranosyl-(1→3)-[a-D-glucopyranosyl-(1→4)]-a-D-galactopyranoside	0	0	0	0	56.02	61.06	61.3	61.86	68.82	70.31	70.76	72.3	72.41	72.83	73.64	74.48	76.74	76.77	77.59	79.06	100.04	100.28	105.12	B	A	A	B	C	B	A	A	B	B	B	B	A	C	A	A	A	B	[22]
133	Methyl b-D-glucopyranosyl-(1→3)-[b-D-glucopyranosyl-(1→4)]-a-D-galactopyranoside	0	0	0	0	56.02	61.71	61.95	61.95	68.54	70.79	70.84	70.96	74.52	74.52	76.61	76.65	76.83	76.87	77.26	79.76	100.31	103.29	104.77	B	B	A	B	C	B	A	A	B	B	B	B	A	C	A	A	A	B	[22]
134	Methyl a-L-fucopyranosyl-(1→3)-[a-L-fucopyranosyl-(1→4)]-a-D-galactopyranoside	0	0	0	0	16.13	16.13	56.06	62.08	67.84	68.11	69.2	69.38	69.48	70.54	70.65	72.49	72.64	72.67	75.3	78.27	99.42	100.46	101.35	A	A	A	B	C	B	E	E	B	A	A	A	B	C	B	E	E	B	[22]
135	Methyl a-L-fucopyranosyl-(1→3)-[b-L-fucopyranosyl-(1→4)]-a-D-galactopyranoside	0	0	0	0	16.06	16.74	56.08	60.95	67.62	69.37	69.43	70.34	71.54	72.17	72.27	72.39	72.81	73.79	75.1	77.49	100.4	100.95	104.08	A	B	A	B	C	B	E	E	B	A	A	A	B	C	B	E	E	B	[22]
136	O-a-D-Glucopyranosyl-(1→6)-O-a-D-glucpyranosyl-(1→4)-a-D-glucose	0	0	0	0	0	62.4	62.4	67.4	71.2	71.2	71.2	71.6	73.1	73.1	73.1	74.3	74.6	74.6	74.6	78.5	93.3	99.3	101.1	A	A	A	D	C	A	A	A	A	A	A	A	D	D	A	A	A	A	[23]
137	O-a-D-Glucopyranosyl-(1→6)-O-a-D-glucpyranosyl-(1→4)-b-D-glucose	0	0	0	0	0	62.4	62.4	67.4	71.2	71.2	71.2	73.1	73.1	74.3	74.6	74.6	75.4	75.8	77.7	78.5	97.2	99.3	101.1	A	A	B	D	C	A	A	A	A	A	A	B	D	C	A	A	A	A	[23]
138	O-a-D-Glucopyranosyl-(1→4)-O-a-D-glucpyranosyl-(1→6)-a-D-glucose	0	0	0	0	0	62.3	62.3	67.5	71	71	71.3	71.6	73	73.3	73.3	74.1	74.6	74.6	75	78.8	93.8	99.3	101.1	A	A	A	C	D	A	A	A	A	A	A	A	C	D	A	A	A	A	[23]
139	O-a-D-Glucopyranosyl-(1→4)-O-a-D-glucpyranosyl-(1→6)-b-D-glucose	0	0	0	0	0	62.3	62.3	67.5	71	71	71.6	73	73.3	74.1	74.6	75	75.8	75.8	77.7	78.8	97.7	99.3	101.1	A	A	B	C	D	A	A	A	A	A	A	B	C	C	A	A	A	A	[23]
140	O-b-D-Glucopyranosyl-(1→6)-O-b-D-glucpyranosyl-(1→6)-b-D-glucose	0	0	0	0	0	62.4	70	70.2	71	71.2	71.2	74.6	74.6	75.5	76.1	76.1	76.8	77.1	77.1	77.1	97.3	103.7	103.7	B	B	B	D	D	A	A	A	A	B	B	B	D	D	A	A	A	A	[23]
141	Methyl b-D-glucopyranosyl-(1→2)-[b-D-glucopyranosyl-(1→3)]-b-D-glucopyranoside	0	0	0	0	55.74	61.57	61.69	61.78	69.28	70.53	70.62	72.05	74.25	74.47	76.78	76.83	76.86	76.87	80.46	81.49	99.73	103.26	104.26	B	B	B	A	B	A	A	A	B	B	B	A	B	C	A	A	A	B	[24]
142	Methyl a-L-fucopyranosyl-(1→3)-[a-D-glucopyranosyl-(1→4)]-a-D-galactopyranoside	0	0	0	0	16.15	56.06	61.42	61.62	67.93	69.34	69.63	70.54	70.74	72.33	72.68	72.95	73.49	73.54	76.69	78.9	100.43	100.77	101.01	A	A	A	B	C	B	A	E	B	A	A	A	B	C	B	E	E	B	[25]
143	Methyl a-L-fucopyranosyl-(1→3)-[b-D-glucopyranosyl-(1→4)]-a-D-galactopyranoside	0	0	0	0	16.27	56.05	61.68	61.86	68.21	69.35	69.45	70.78	70.78	71.46	72.63	74.34	76.31	76.87	77.12	77.6	100.45	101.13	103.44	A	B	A	B	C	B	A	E	B	A	A	A	B	C	B	A	E	B	[25]
144	Methyl b-L-fucopyranosyl-(1→3)-[a-D-glucopyranosyl-(1→4)]-a-D-galactopyranoside	0	0	0	0	16.23	55.99	61.35	61.47	68.2	70.55	71.21	71.97	72.12	72.12	72.85	73.16	73.54	73.69	78.26	78.38	100.17	101.24	103.22	B	A	A	B	C	B	A	E	B	B	A	A	B	C	B	E	E	B	[25]
145	Methyl b-L-fucopyranosyl-(1→3)-[b-D-glucopyranosyl-(1→4)]-a-D-galactopyranoside	0	0	0	0	16.21	55.99	61.69	62	67.94	70.86	71.07	71.6	71.76	72.25	73.92	74.45	75.42	76.61	76.75	77.39	100.16	101.43	103.7	B	B	A	B	C	B	A	E	B	B	B	A	B	C	B	A	A	B	[25]
146	Methyl a-D-glucopyranosyl-(1→3)-[a-D-fucopyranosyl-(1→4)]-a-D-galactopyranoside	0	0	0	0	16.15	56.02	61.55	62.3	67.76	67.96	69.37	70.31	70.54	72.29	72.35	72.62	72.66	73.88	74.04	76.84	96.94	100.18	100.45	A	A	A	B	C	B	E	A	B	A	A	A	B	C	B	C	E	B	[25]
147	Methyl b-D-glucopyranosyl-(1→3)-[b-D-fucopyranosyl-(1→4)]-a-D-galactopyranoside	0	0	0	0	16.48	55.98	61.42	61.93	68.45	70.84	71.61	71.76	72.1	72.28	74.03	74.58	76.63	76.74	78.47	78.77	100.29	104.19	104.79	B	B	A	B	C	B	E	A	B	B	B	A	B	C	A	A	A	B	[25]
148	Methyl a-D-mannopyranosyl-(1→3)-[a-D-mannopyranosyl-(1→4)]-a-L-rhamnopyranoside	0	0	0	0	18.7	56.2	62.3	62.3	67.25	68.1	68.2	69.45	70.9	71.3	71.7	71.8	74.5	74.8	74.8	77.5	97.8	101.5	101.6	A	A	A	B	C	D	C	C	B	A	A	A	B	C	D	C	C	B	[25]
149	Methyl a-D-mannopyranosyl-(1→3)-[b-D-glucopyranosyl-(1→4)]-a-L-rhamnopyranoside	0	0	0	0	18.3	56.3	62.1	62.3	67	68.2	68.9	71.2	71.5	72.1	74.3	75	75.3	77.3	77.3	77.6	97.4	101.9	103.5	A	B	A	B	C	D	A	C	B	A	B	A	B	C	D	C	C	B	[25]
150	Methyl a-D-mannopyranosyl-(1→3)-[a-L-rhamnopyranosyl-(1→4)]-a-L-rhamnopyranoside	0	0	0	0	17.55	18.7	56	62.1	66.3	67.6	68.2	70.9	71.1	71.4	71.8	71.8	72.7	74.8	75.2	78.3	96.5	101.7	102.7	A	A	A	B	C	D	D	C	B	A	A	A	B	C	D	C	C	B	[25]
151	Methyl a-D-mannopyranosyl-(1→3)-[b-L-fucopyranosyl-(1→4)]-a-L-rhamnopyranoside	0	0	0	0	17	18.1	56.2	62.3	67.6	68.6	69.6	71.4	71.6	71.7	72.8	73	73.2	73.4	74.3	78.5	97.1	101.8	104.3	A	B	A	B	C	D	E	C	B	A	A	A	B	C	D	C	D	B	[25]
152	Methyl b-D-glucopyranosyl-(1→3)-[a-D-mannopyranosyl-(1→4)]-a-L-rhamnopyranoside	0	0	0	0	18.75	56.2	62.1	62.3	68.1	69	70.8	70.8	71.3	71.6	74.7	74.7	77.2	77.4	78.6	80.8	101.6	101.6	104.1	B	A	A	B	C	D	C	A	B	A	B	A	B	C	D	A	C	B	[25]
153	Methyl b-D-glucopyranosyl-(1→3)-[b-D-glucopyranosyl-(1→4)]-a-L-rhamnopyranoside	0	0	0	0	18.4	56.2	62.1	62.3	68.6	71	71.3	71.3	74.9	75.2	77.3	77.3	77.4	77.6	79.45	81.8	101.8	103.8	104.7	B	B	A	B	C	D	A	A	B	B	B	B	B	C	A	A	A	B	[25]
154	Methyl b-D-glucopyranosyl-(1→3)-[a-L-rhamnopyranosyl-(1→4)]-a-L-rhamnopyranoside	0	0	0	0	17.8	18.9	56.1	62.1	68.5	70.7	70.9	71.4	71.6	71.6	73.4	74.65	77.2	77.5	79.1	82.2	101.75	102.7	104.8	B	A	A	B	C	D	D	A	B	B	B	A	B	C	D	A	D	B	[25]
155	Methyl b-D-glucopyranosyl-(1→3)-[b-L-fucopyranosyl-(1→4)]-a-L-rhamnopyranoside	0	0	0	0	16.4	18	56	62.1	69.2	70.9	71.15	72.3	72.3	72.4	74.3	74.7	76.5	77.1	80.4	81	101.6	104.6	105.75	B	B	A	B	C	D	E	A	B	B	B	B	A	C	A	A	A	B	[25]
156	Methyl a-L-rhamnopyranosyl-(1→3)-[a-D-mannopyranosy-(1→4)]-a-L-rhamnopyranoside	0	0	0	0	17.8	18.7	56.1	62.4	67.9	69.2	70.4	71.4	71.6	71.6	71.6	71.7	73.4	74.8	78.9	79.9	101.8	102.1	103.7	A	A	A	B	C	D	C	D	B	A	A	A	B	C	D	D	D	B	[25]
157	Methyl a-L-rhamnopyranosyl-(1→3)-[b-D-glucopyranosy-(1→4)]-a-L-rhamnopyranoside	0	0	0	0	17.8	18.35	56.2	62.2	68.7	70.4	71.2	71.2	71.5	71.7	73.4	74.7	77.1	77.25	78.7	80.5	101.95	103.7	103.9	A	B	A	B	C	D	A	D	B	B	A	A	B	C	D	D	A	B	[25]
158	Methyl a-L-rhamnopyranosyl-(1→3)-[b-L-fucopyranosy-(1→4)]-a-L-rhamnopyranoside	0	0	0	0	16.9	17.9	18.1	56.1	69.3	70.3	71.3	71.3	71.6	72	72.6	72.8	73.5	74.3	76.5	81.4	101.8	102.8	104.8	A	B	A	B	C	D	E	D	B	B	A	A	B	C	D	D	E	B	[25]
159	Methyl b-L-fucopyranosyl-(1→3)-[a-D-mannopyranosy-(1→4)]-a-L-rhamnopyranoside	0	0	0	0	16.8	18.5	56.1	62.6	68.4	68.9	69.5	71.5	71.5	71.95	72.1	72.9	73.7	74.3	76.6	77	101.3	101.5	101.6	B	A	A	B	C	D	C	E	B	A	A	A	B	C	D	E	E	B	[25]
160	Methyl b-L-fucopyranosyl-(1→3)-[a-L-rhamnopyranosy-(1→4)]-a-L-rhamnopyranoside	0	0	0	0	16.7	17.8	18.7	56.1	68.4	68.9	70.7	71.45	71.6	72.1	72.1	72.8	73.3	74.3	78.3	79.25	101.7	101.9	102.8	B	A	A	B	C	D	D	E	B	B	B	A	B	C	D	E	E	B	[25]
161	Methyl b-L-fucopyranosyl-(1→3)-[b-L-fucopyranosy-(1→4)]-a-L-rhamnopyranoside	0	0	0	0	16.7	16.7	18.5	56.2	69.45	69.55	71.5	72	72.2	72.4	72.6	72.6	74.3	74.3	76.1	79.3	101.6	101.9	103.5	B	B	A	B	C	D	E	E	B	B	B	A	B	C	D	E	E	B	[25]
162	Methyl a-D-galactopyranosyl-(1→2)-O-a-D-mannopyranosyl-(1→4)-a-L-rhamnopyranoside	0	0	0	0	17.77	55.51	61.59	61.78	67.86	68.09	69.59	69.96	70.06	70.16	71.05	71.3	72.08	73.88	80.27	82.07	100.44	101.36	101.97	A	A	A	A	C	D	C	B	A	A	A	A	A	C	E	C	B	B	[26]
163	Methyl b-D-N-acetyl glucosaminepyranosyl-(1→2)-[a-D-glucopyranosy-(1→3)]-a-L-rhamnopyranoside	0	0	17.61	23.44	55.61	56.49	61.34	61.66	69.65	70.42	70.84	71.72	72.18	72.35	73.99	74.88	75.15	75.15	76.8	95.7	100.79	102.65	175.19	B	A	A	A	B	D	A	A	B	B	B	B	A	C	A	A	A	B	[26]
164	Methyl a-D-N-acetyl galactosaminepyranosyl-(1→2)-[b-D-N-acetyl glucosaminepyranosy-(1→3)]-a-L-rhamnopyranoside	17.54	22.88	23.08	50.8	55.74	56.68	61.81	61.87	68.4	69.36	69.9	71.08	71.3	72.73	74.97	75.49	76.72	78.59	96.8	98.74	103.5	175.21	175.26	A	B	A	A	B	D	A	B	B	B	B	A	A	C	A	B	B	A	[26]
165	O-b-D-N-Acetyl glucosaminepyranosyl-(1→6)-O-b-D-galactopyranosyl-(1→4)-a-D-glucose	0	0	0	25.019	58.196	62.566	63.382	70.94	71.136	72.564	72.699	73.515	73.91	74.115	75.059	76.231	76.492	78.544	81.512	94.492	103.752	105.697	177.356	B	B	A	D	C	A	B	A	A	B	B	B	D	C	A	B	A	A	[27]
166	O-b-D-N-Acetyl glucosaminepyranosyl-(1→6)-O-b-D-galactopyranosyl-(1→4)-b-D-glucose	0	0	0	0	0	62.7	63.65	71.14	71.31	71.67	73.48	73.48	75.12	75.29	76.46	76.64	77.22	77.34	77.75	82.14	98.34	105.77	106.01	B	B	B	D	C	A	B	A	A	B	B	B	D	C	A	A	A	A	[27]
167	O-b-D-Glucopyranosyl-(1→3)-O-b-D-glucopyranosyl-(1→4)-a-D-glucose	0	0	0	0	0	60.8	61.4	61.5	68.8	70.4	70.9	72	72.2	73.8	74.2	76.36	76.39	76.8	79.6	84.9	92.6	103.1	103.6	B	B	A	B	C	A	A	A	A	B	B	A	A	C	A	A	A	A	[28]
168	O-b-D-Glucopyranosyl-(1→3)-O-b-D-glucopyranosyl-(1→4)-b-D-glucose	0	0	0	0	0	60.9	61.4	61.5	68.8	70.4	73.8	74.2	74.7	75.1	75.6	76.36	76.39	76.8	79.5	84.9	96.6	103.1	103.6	B	B	B	B	C	A	A	A	A	B	B	B	B	C	A	A	A	A	[28]
169	Methyl O-b-D-Glucopyranosyl-(1→4)-O-b-D-glucopyranosyl-(1→4)-b-D-glucopyranoside	0	0	0	0	57.11	59.69	59.81	60.42	69.29	72.74	72.79	72.99	73.9	74.13	74.62	74.67	75.32	75.82	78.21	78.36	102.21	102.43	102.94	B	B	B	C	C	A	A	A	A	B	B	B	B	C	A	A	A	B	[29]
170	Methyl b-D-galactopyranosyl-(1→2)-[a-D-galactopyranosyl-(1→4)]-b-D-mannopyranoside	0	0	0	0	57.82	61.63	61.79	61.79	69.44	69.6	70.01	70.24	72.12	72.53	73.29	73.42	75.93	75.99	76.13	79.02	100.84	101.87	104.69	B	A	B	A	C	C	B	B	B	B	A	B	A	C	C	B	B	B	CASPER
171	Methyl a-D-galactopyranosyl-(1→2)-[a-D-galactopyranosyl-(1→4)]-b-D-mannopyranoside	0	0	0	0	57.66	61.6	61.79	61.97	69.6	69.9	69.97	70.01	70.24	70.37	71.6	72.53	74.87	75.95	76.3	78.59	100.84	100.93	101.91	A	A	B	A	C	C	B	B	B	A	A	B	A	C	C	C	B	B	CASPER
172	O-b-D-Galactopyranosyl-(1→2)-O-a-D-galactopyranosyl-(1→4)-b-D-mannose	0	0	0	0	0	61.73	61.83	61.91	69.14	69.55	69.9	71.92	72.01	72.24	73.67	74.28	75.45	75.6	75.93	78.47	94.35	100.46	105.12	B	A	B	A	C	C	B	B	A	B	A	A	A	C	B	A	B	A	CASPER
173	Methyl O-b-D-galactopyranosyl-(1→2)-O-a-D-galactopyranosyl-(1→2)-b-D-mannose	0	0	0	0	57.62	61.54	61.83	62.05	68.54	69.27	69.55	69.86	71.31	72.01	73.67	74.62	75.93	77.35	78.77	78.8	101.13	101.53	105.12	B	A	B	A	A	C	B	B	A	A	A	A	A	C	C	B	B	B	CASPER
174	O-b-D-galactopyranosyl-(1→2)-O-a-D-galactopyranosyl-(1→4)-b-L-fucose	0	0	0	0	0	16.27	61.83	61.96	69.18	69.55	70.02	71.4	71.92	72.01	72.19	72.82	73.67	75.93	78.4	81.73	96.62	101.83	105.12	B	A	B	A	A	E	B	B	A	A	A	A	A	C	A	E	B	B	CASPER
175	O-a-L-N-Acetyl rhamnosaminepyranosyl-(1→2)-O-b-D-galactopyranosyl-(1→4)-b-L-fucose	0	0	0	15.64	16.92	22.84	54.63	61.64	69.41	69.53	69.83	71.77	73.22	73.26	73.6	74.15	76.06	79.35	82.07	97.26	101.48	103.22	175.43	A	B	B	A	C	E	B	D	A	B	B	B	A	C	E	D	D	A	CASPER
176	Methyl O-a-L-rhamnopyranosyl-(1→4)-O-a-L-N-acetyl rhamnosaminepyranosy-(1→4)-b-L-fucopyranoside	0	0	16.64	17.34	17.37	22.84	54.61	57.9	68.41	70.11	70.26	70.36	71.29	71.32	72.21	73.08	74.54	81.37	82.2	101.95	103.05	104.49	175.43	A	A	B	C	C	E	D	D	A	B	A	B	C	C	E	D	D	A	CASPER
177	Methyl O-a-D-N-acetyl glucosaminepyranosyl-(1→6)-O-b-D-glucopyranosyl-(1→6)-b-D-mannopyranoside	0	0	22.87	54.94	57.84	61.54	66.87	67.77	69.83	70.54	71.04	71.16	72.06	72.88	73.85	74.08	75.14	76.16	76.94	97.62	101.97	103.72	175.13	A	B	B	D	D	C	A	A	A	B	B	B	D	D	A	A	A	A	CASPER
178	Methyl O-a-D-mannopyranosyl-(1→6)-O-b-D-glucopyranosyl-(1→6)-b-D-mannopyranoside	0	0	0	0	57.84	61.92	66.74	67.76	67.77	69.83	70.58	70.95	71.04	71.64	73.65	73.85	74.06	75.11	76.16	76.99	100.49	101.97	103.69	A	B	B	D	D	C	A	C	A	A	A	B	D	D	C	C	B	A	CASPER
179	Methyl O-a-D-N-acetyl galactosaminepyranosyl-(1→6)-O-b-D-galactopyranosyl-(1→6)-b-D-mannopyranoside	0	0	22.91	50.93	57.84	61.9	67.44	67.77	68.67	69.48	69.73	69.83	71.04	71.81	71.82	73.74	73.85	73.86	76.16	97.99	101.97	104.16	175.43	A	B	B	D	D	C	B	B	A	A	A	B	D	D	C	B	B	A	CASPER
180	Methyl O-b-L-rhamnopyranosyl-(1→4)-O-a-L-N-acetyl rhamnosaminepyranosy-(1→4)-b-L-fucopyranoside	0	0	16.64	16.85	17.38	22.84	54	57.9	68.42	68.56	70.26	71.18	71.32	72.59	73.01	73.63	74.54	81.37	83.26	101.22	101.77	104.49	175.43	B	A	B	C	C	E	D	D	A	A	A	B	C	C	E	D	D	A	CASPER
181	Methyl O-b-D-galactopyranosyl-(1→4)-O-a-L-rhamnopyranosy-(1→4)-b-D-mannopyranoside	0	0	0	0	17.65	57.63	61.48	61.76	68.52	69.58	70.99	71.25	71.75	72.57	72.61	73.79	75.75	76	76.18	82.17	101.65	101.78	104.55	B	A	B	C	C	C	D	B	A	B	A	B	A	C	B	A	D	B	CASPER
182	Methyl a-D-galactopyranosyl-(1→4)-[a-D-N-Acetyl glucopyranosy-(1→6)]-b-D-mannopyranoside	0	0	22.87	54.96	57.81	61.59	61.79	67.19	69.6	70.01	70.24	70.85	71.22	72.07	72.53	72.91	74.21	74.39	75.64	97.63	100.84	101.74	175.13	A	A	B	C	D	C	A	B	B	A	A	B	D	D	C	B	B	A	CASPER
183	Methyl a-D-galactopyranosyl-(1→4)-[a-D-mannopyranosyl-(1→6)]-b-D-mannopyranoside	0	0	0	0	57.8	61.79	61.8	66.52	67.7	69.6	70.01	70.24	70.8	70.84	71.5	72.53	73.6	73.85	74.12	75.26	100.3	100.84	101.74	A	A	B	C	D	C	C	B	B	A	A	B	D	C	C	C	B	B	CASPER
184	a-L-N-Acetyl rhamnosaminepyranosyl-(1→4)-[a-D-mannopyranosyl-(1→6)]-b-D-mannose	0	0	0	16.97	22.84	54.2	61.8	66.03	67.7	69.58	69.58	70.8	71.5	72.23	72.61	73.14	73.6	74.23	75.16	94.36	100.3	100.97	175.43	A	A	B	C	D	C	C	D	B	A	A	A	D	C	E	B	D	A	CASPER
185	a-D-Galactopyranosyl-(1→2)-[a-D-galactopyranosyl-(1→4)]-a-L-fucose	0	0	0	0	0	16.47	61.84	62.02	67.14	69.53	69.95	69.97	70.13	70.14	70.28	70.49	72.21	72.47	78.77	82.67	92.6	102.21	102.32	A	A	A	A	C	E	B	B	B	A	A	A	A	C	E	C	B	A	CASPER
186	a-D-Galactopyranosyl-(1→2)-[b-D-mannopyranosyl-(1→4)]-a-L-fucose	0	0	0	0	0	16.5	61.91	62.02	65.46	67.58	69.1	69.53	70.13	70.28	71.78	72.21	74.04	77.07	78.09	81.66	92.42	101.73	102.21	A	B	A	A	C	E	C	B	B	A	A	A	A	C	E	C	C	A	CASPER
187	Methyl b-D-galactopyranosyl-(1→2)-[a-D-mannopyranosyl-(1→4)]-a-D-mannopyranoside	0	0	0	0	55.72	61.48	61.64	61.74	67.67	69.47	70.93	71.36	71.41	71.94	72.04	73.46	74.57	75.81	76.05	78.18	99.66	102.6	103.19	B	A	A	A	C	C	C	B	B	A	A	B	B	C	B	C	B	B	CASPER
188	Methyl a-D-mannopyranosyl-(1→4)-[a-L-rhamnopyranosyl-(1→6)]-b-D-galactopyranoside	0	0	0	0	17.4	58.15	61.74	67.67	68.21	69.54	71.29	71.36	71.38	71.92	71.94	73.14	73.84	73.96	74.57	77.35	101.79	102.6	104.66	A	A	B	C	D	B	D	C	B	A	A	B	C	D	C	C	D	B	CASPER
189	a-L-Rhamnopyranosyl-(1→4)-[b-L-rhamnopyranosyl-(1→6)]-b-D-mannose	0	0	0	0	0	17.42	17.46	68.68	69.92	70.98	71.08	71.75	72.22	72.47	72.7	72.9	73.15	73.73	74.88	75.35	94.4	100.78	101.95	A	B	B	C	D	C	D	D	B	B	B	A	C	D	B	D	D	B	CASPER
190	b-L-Rhamnopyranosyl-(1→4)-[b-L-rhamnopyranosyl-(1→6)]-b-D-galactose	0	0	0	0	0	17.44	17.49	68.35	70.9	71.2	72.58	72.71	72.76	72.9	73.05	73.62	73.75	73.75	74.14	79.53	97.62	100.92	101.38	B	B	B	C	D	B	D	D	B	A	B	B	C	D	A	D	D	A	CASPER
191	O-b-L-N-Acetyl rhamnosaminepyranosyl-(1→2)-O-b-L-rhamnopyranosyl-(1→2)-b-L-fucose	0	0	0	16.24	17.02	17.42	22.98	54.2	71.38	72.29	72.55	72.58	72.66	72.84	73.2	73.31	73.44	79.9	80.46	95.29	99.91	101.64	176.39	B	B	B	A	A	E	D	D	A	B	B	B	A	C	A	D	D	A	CASPER
192	O-a-L-N-Acetyl rhamnopyranosyl-(1→2)-O-b-D-mannopyranosyl-(1→2)-b-L-fucose	0	0	0	16.29	17.02	22.84	54.8	61.73	67.76	69.73	69.8	71.54	72.27	73.15	73.15	73.83	77.38	79.39	80.61	96.02	101.33	102.89	175.43	A	B	B	A	A	E	C	D	A	A	B	B	A	C	E	B	D	A	CASPER
193	Methyl O-a-L-rhamnopyranosyl-(1→2)-O-b-L-rhamnopyranosyl-(1→2)-b-D-mannopyranoside	0	0	0	0	17.44	17.63	57.61	61.98	68.29	69.91	70.99	71.08	72.82	73.12	73.32	73.41	73.89	77.34	79.58	80.83	100.52	101.13	102.89	A	B	B	A	A	C	D	D	A	B	B	B	A	C	B	D	D	B	CASPER
194	Methyl O-a-D-N-acetyl galactosaminepyranosyl-(1→2)-O-a-D-galactopyranosyl-(1→2)-a-D-galactopyranoside	0	0	22.91	50.95	55.78	61.67	61.78	62.02	68.38	68.48	68.83	69.39	70.09	70.17	71.4	71.64	71.84	73.77	73.8	95	96.53	97.59	175.43	A	A	A	A	A	B	B	B	A	A	A	A	A	A	B	B	B	A	CASPER
195	Methyl O-a-D-galactopyranosyl-(1→2)-O-a-D-mannopyranosyl-(1→2)-a-D-galactopyranoside	0	0	0	0	55.7	61.86	61.92	62	68.02	68.91	69.61	70.1	70.17	70.26	71.23	71.39	72.18	72.88	73.76	80.48	97.09	97.43	101.88	A	A	A	A	A	B	C	B	A	A	A	A	A	C	C	C	B	A	CASPER
196	O-a-D-Mannopyranosyl-(1→2)-O-a-D-mannopyranosyl-(1→2)-a-L-fucose	0	0	0	0	0	16.19	61.95	61.99	66.86	67.8	67.87	69.17	70.87	70.99	71.33	72.84	74.13	74.16	77.95	79.05	92.5	102.15	102.99	A	A	A	A	A	E	C	C	A	A	B	A	A	C	E	C	B	B	CASPER
197	Methyl O-a-D-mannopyranosyl-(1→6)-O-b-D-galactopyranosy-(1→4)-a-L-fucopyranoside	0	0	0	0	16.11	56.08	61.92	66.47	67.4	67.76	69.34	69.67	69.83	70.95	71.64	72.11	73.65	73.79	74.37	81.97	100.42	100.49	104.7	A	B	A	D	C	E	B	C	A	A	A	A	D	C	B	C	C	B	CASPER
198	O-a-L-Rhamnopyranosyl-(1→6)-O-b-D-galactopyranosyl-(1→4)-a-L-fucose	0	0	0	0	0	15.64	17.39	67.23	67.67	69.6	69.61	69.63	69.96	71.32	71.74	71.84	73.11	73.54	74.85	82.52	93.23	101.54	104.56	A	B	A	D	C	E	B	D	A	A	A	A	C	C	E	E	E	B	CASPER
199	Methyl O-b-D-mannopyranosyl-(1→6)-O-a-D-N-Acetyl galactosaminepyranosy-(1→4)-a-L-fucopyranoside	0	0	16.84	22.91	51.76	56.03	62.04	67.11	67.88	68.6	69.33	69.5	69.51	71.28	71.43	71.52	73.97	77.18	82.85	100.4	100.78	101.48	175.43	B	A	A	D	C	E	B	C	A	A	A	A	D	C	E	B	D	A	CASPER
200	Methyl O-b-L-N-acetyl rhamnosaminepyranosyl-(1→6)-O-a-D-galactopyranosy-(1→4)-a-L-fucopyranoside	0	0	16.84	17.04	22.98	53.71	56.03	67.11	68.95	69.51	69.91	70	70.13	70.48	71.43	72.67	72.72	73.15	82.85	100.28	100.4	102.09	176.39	B	A	A	D	C	E	B	D	A	A	A	A	D	C	E	B	D	A	CASPER
201	Methyl O-b-L-N-acetyl rhamnosaminepyranosyl-(1→6)-O-a-D-N-Acetyl galactosaminepyranosy-(1→6)-a-D-glucopyranoside	17.04	22.91	22.98	51.04	53.71	56.09	66.92	68.38	69.12	69.64	69.84	70.67	71.03	72.19	72.67	72.72	73.15	74.31	97.95	100.24	100.28	175.43	176.39	B	A	A	D	D	A	B	D	A	B	A	B	D	D	E	B	D	A	CASPER
202	Methyl O-b-L-N-acetyl rhamnosaminepyranosyl-(1→6)-O-a-D-galactopyranosy-(1→6)-b-D-glucopyranoside	0	0	17.04	22.98	53.71	57.95	66.83	69	69.21	69.75	70.1	70.3	70.53	72.67	72.72	73.15	73.99	75.18	76.94	99.17	100.28	104.23	176.39	B	A	B	D	D	A	B	D	A	B	A	B	D	D	C	B	D	A	CASPER
203	Methyl O-b-L-rhamnopyranosyl-(1→6)-O-a-D-mannopyranosy-(1→6)-b-D-mannopyranoside	0	0	0	0	17.46	57.76	66.6	67.5	67.5	69.03	70.74	70.98	71.05	71.3	72.4	72.7	72.9	73.73	73.87	75.25	100.39	100.78	101.94	B	A	B	D	D	C	C	D	A	A	A	A	D	D	B	C	C	B	CASPER
204	Methyl O-b-L-N-acetyl rhamnosaminepyranosyl-(1→6)-O-a-D-mannopyranosy-(1→6)-b-D-galactopyranoside	0	0	17.01	22.98	53.79	57.91	66.72	67.56	69.15	69.5	70.89	71.44	71.62	72.45	72.66	72.7	73.15	74	74.29	100.14	100.58	104.79	176.39	B	A	B	D	D	B	C	D	A	B	A	B	D	D	A	B	D	A	CASPER

## Sheet: TABLE S2
TABLE S2. Data set, classification of the anomeric configurations, type of linkages, residues and chain type of 27 trisaccharides
	and RF trisaccharide predictions for the tes set using 1D 13C NMR descriptors.
		Spectral 13C NMR descriptors																							Classification									RF trisaccharides predictions
ID	Chemical name	C1	C2	C3	C4	C5	C6	C7	C8	C9	C10	C11	C12	C13	C14	C15	C16	C17	C18	C19	C20	C21	C22	C23	Ano_F	Ano_S	Ano_R	F_Link	S_Link	Red_end	M_residue	F_Residue	Chain_Type	Ano_F	Ano_S	Ano_R	F_Link	S_Link	Red_end	M_residue	F_Residue	Chain_Type	References
43	Methyl a-D-mannopyranosyl-(1→2)-[a-D-mannopyranosyl-(1→3)]-b-D-glucopyranoside	0	0	0	0	58.1	62	62.2	62.3	68.1	68.2	71.2	71.2	71.5	71.5	71.5	74.5	74.5	76.5	76.9	79.2	100.4	100.7	104.7	A	A	B	A	B	A	C	C	B	A	A	B	A	C	C	C	C	B	[20]
44	Methyl a-D-mannopyranosyl-(1→2)-[a-D-mannopyranosyl-(1→3)]-b-D-glucopyranoside	0	0	0	0	56	61.7	62.2	62.4	68.3	68.3	71.2	71.2	71.7	71.7	71.9	72.9	73.6	74.4	74.4	76.3	96.9	97.9	101.3	A	A	A	A	B	A	C	C	B	A	A	A	B	C	B	C	B	B	[20]
45	Methyl b-D-galactopyranosyl-(1→2)-[b-D-galactopyranosyl-(1→3)]-a-D-glucopyranoside	0	0	0	0	56.1	62	62.2	62.3	69.8	70	70	72.4	72.4	72.7	74.3	74.3	76.3	76.5	80.7	82	100.2	104.2	105.2	B	B	A	A	B	A	B	B	B	B	B	B	A	B	A	B	B	B	[20]
46	Methyl a-L-rhamnopyranosyl-(1→2)-[b-D-galactopyranosyl-(1→3)]-b-D-glucopyranoside	0	0	0	0	17.6	58.3	62.2	62.2	69.7	69.9	70	71.5	71.7	72.2	73.4	74.1	76.4	76.6	80.7	85.9	102.7	103.6	104.3	A	B	B	A	B	A	B	D	B	B	B	B	A	B	A	B	B	B	[20]
47	Methyl b-L-fucopyranosyl-(1→2)-[b-D-galactopyranosyl-(1→3)]-b-D-glucopyranoside	0	0	0	0	16.4	58.6	62	62.2	69.7	70.1	72.1	72.3	72.5	72.6	73.5	74.1	76.4	76.6	80	86.1	104.1	104.6	105.7	B	B	B	A	B	A	B	E	B	B	B	B	A	B	A	A	B	B	[20]
48	Methyl b-D-galactopyranosyl-(1→2)-[a-L-fucopyranosyl-(1→3)]-b-D-glucopyranoside	0	0	0	0	16.5	62	62.2	68.3	69.5	70	70	70.9	72.8	73.2	74	76.5	76.8	81.8	83.6	100.7	103.8	104	58.4	B	A	B	A	B	A	E	B	B	B	B	B	D	D	A	B	B	A	[20]
49	Methyl a-L-rhamnopyranosyl-(1→2)-[a-L-rhamnopyranosyl-(1→3)]-b-D-glucopyranoside	0	0	0	0	17.7	17.7	58.3	62.2	69.8	70.1	70.3	71.7	71.7	71.8	71.9	73.2	73.3	76.9	81.7	85.2	102.7	102.7	103.4	A	A	B	A	B	A	D	D	B	A	A	B	A	B	A	D	D	B	[20]
50	Methyl b-D-galactopyranosyl-(1→2)-[b-L-fucopyranosyl-(1→3)]-b-D-glucopyranoside	0	0	0	0	16.6	58.4	62	62.1	69.8	71.2	72.6	72.6	72.8	73	73.6	74.2	76.5	76.6	81.8	85.1	103.9	105.3	105.8	B	B	B	A	B	A	E	B	B	B	B	B	A	B	A	A	A	B	[20]
51	Methyl a-D-mannopyranosyl-(1→2)-[b-L-rhamnopyranosyl-(1→3)]-b-D-glucopyranoside	0	0	0	0	17.9	58.4	62.4	62.6	68.1	70.1	70.4	71.6	71.8	71.8	72	73.4	75	77.1	79.6	82.3	101.5	102.7	104.8	A	B	B	A	B	A	D	C	B	A	A	B	A	B	A	C	D	B	[20]
52	Methyl a-L-rhamnopyranosyl-(1→2)-[a-L-rhamnopyranosyl-(1→3)]-a-D-glucopyranoside	0	0	0	0	17.8	17.8	56.2	61.9	69.6	70.1	70.5	71.7	71.7	71.7	71.7	72.7	73.3	73.3	80.2	82	99.8	102.5	103.8	A	A	A	A	B	A	D	D	B	A	A	A	A	C	D	D	D	B	[20]
53	Methyl a-L-fucopyranosyl-(1→2)-[b-L-fucopyranosyl-(1→3)]-a-D-glucopyranoside	0	0	0	0	16.7	16.7	56.2	61.8	68.6	70	71.1	71.6	72.6	72.6	72.6	72.6	73.1	74.3	80.3	82	100.2	102.8	105.4	A	B	A	A	B	A	E	E	B	B	B	A	A	B	A	E	E	B	[20]
54	O-b-D-Mannopyranosyl-(1→4)-O-b-D-mannpyranosyl-(1→4)-a-D-mannose	0	0	0	0	0	62	62	62.4	68.2	70.4	71.4	71.9	71.9	72.4	73	74.3	76.5	77.9	77.9	77.9	95.2	101.6	101.6	B	B	A	C	C	C	C	C	A	B	B	A	C	C	C	C	C	A	[21]
55	O-b-D-Mannopyranosyl-(1→4)-O-b-D-mannpyranosyl-(1→4)-b-D-glucose	0	0	0	0	0	62	62	62.4	68.4	71.5	72	73	74.3	75.3	75.7	76.1	76.5	77.9	77.9	80.6	97.3	101.5	101.7	B	B	B	C	C	A	C	C	A	B	B	B	C	C	A	A	A	A	[21]
56	Methyl a-D-glucopyranosyl-(1→3)-[a-D-glucopyranosyl-(1→4)]-a-D-galactopyranoside	0	0	0	0	56.04	61.53	61.64	61.8	67.99	70.54	70.54	71.95	72.62	72.76	72.84	73.52	73.62	74.21	75.71	77.8	96.88	100.42	101.4	A	A	A	B	C	B	A	A	B	B	A	A	B	C	B	A	B	B	[21]
57	Methyl b-L-fucopyranosyl-(1→3)-[a-L-fucopyranosyl-(1→4)]-a-D-galactopyranoside	0	0	0	0	16.1	16.17	55.97	62.24	68.01	68.07	69.54	70.47	71.48	71.9	72.15	72.19	72.63	73.91	75.4	79.1	100.1	100.46	102.26	B	A	A	B	C	B	E	E	B	A	A	A	B	C	B	E	E	B	[22]
58	Methyl b-L-fucopyranosyl-(1→3)-[b-L-fucopyranosyl-(1→4)]-a-D-galactopyranoside	0	0	0	0	16.16	16.39	55.98	61.15	67.92	71.56	71.87	71.94	72.01	72.17	72.22	72.26	73.8	73.91	74.76	77.84	99.96	102.56	103.75	B	B	A	B	C	B	E	E	B	B	B	A	B	C	B	E	E	B	[22]
59	O-a-D-Glucopyranosyl-(1→4)-O-a-D-glucpyranosyl-(1→4)-a-D-glucose	0	0	0	0	0	62.4	62.4	62.4	71.2	71.6	72.7	73.1	73.4	73.4	74.3	74.7	74.7	75.1	78.5	78.5	93.4	101.1	101.1	A	A	A	C	C	A	A	A	A	A	A	B	D	C	A	A	A	A	[23]
60	O-a-D-Glucopyranosyl-(1→4)-O-a-D-glucpyranosyl-(1→4)-b-D-glucose	0	0	0	0	0	62.4	62.4	62.4	71.2	72.7	73.1	73.4	74.3	74.7	75.1	75.9	76.3	77.8	78.5	78.9	97.1	101.1	101.1	A	A	B	C	C	A	A	A	A	B	B	B	D	C	A	A	A	A	[23]
61	O-b-D-Glucopyranosyl-(1→6)-O-b-D-glucpyranosyl-(1→6)-a-D-glucose	0	0	0	0	0	62.4	70	70.2	71	71.2	71.2	71.2	73.1	74.3	74.6	74.6	76.1	77.1	77.1	77.1	93.4	103.7	103.7	B	B	A	D	D	A	A	A	A	B	B	B	D	D	A	A	A	A	[23]
62	Methyl b-D-glucopyranosyl-(1→2)-[b-D-glucopyranosyl-(1→3)]-b-D-mannopyranoside	0	0	0	0	55.77	61.52	61.57	61.63	66	70.42	70.52	73.39	73.66	74.06	74.96	76.47	76.66	76.85	76.89	77.55	99.62	100.97	102.53	B	B	B	A	B	C	A	A	B	B	B	B	B	C	B	A	A	B	[24]
63	Methyl a-D-glucopyranosyl-(1→3)-[b-D-fucopyranosyl-(1→4)]-a-D-galactopyranoside	0	0	0	0	16.2	56.06	61.11	61.54	67.76	70.45	71.82	71.94	72.12	72.24	72.24	72.67	72.93	73.8	74.18	74.59	96.01	100.26	103.7	A	B	A	B	C	B	E	A	B	B	A	A	B	C	B	E	E	B	[25]
64	Methyl b-D-glucopyranosyl-(1→3)-[a-D-fucopyranosyl-(1→4)]-a-D-galactopyranoside	0	0	0	0	16.14	55.98	61.75	62.23	68.03	68.49	69.57	70.48	70.7	71.87	72.65	74.41	76.58	76.72	77.32	80.69	100.2	100.24	104.92	B	A	A	B	C	B	E	A	B	A	A	A	B	C	B	A	E	B	[25]
65	Methyl a-L-rhamnopyranosyl-(1→3)-[a-L-rhamnopyranosyl-(1→4)]-a-L-rhamnopyranoside	0	0	0	0	17.8	18	18.7	56.3	68.8	70.6	70.9	71.4	71.9	72	72.1	72.1	73.3	73.5	80.1	81.5	102.1	103.2	103.8	A	A	A	B	C	D	D	D	B	B	A	A	B	C	D	D	D	B	[25]
66	Methyl b-L-fucopyranosyl-(1→3)-[b-D-glucopyranosy-(1→4)]-a-L-rhamnopyranoside	0	0	0	0	16.6	18.3	56.1	62.1	68.9	68.9	71	71.8	72.5	72.6	74.3	75.25	77.2	77.2	79	80.9	101.6	102.3	105.1	B	B	A	B	C	D	A	E	B	B	B	A	B	C	D	E	A	B	[26]
67	Methyl O-b-D-mannopyranosyl-(1→2)-O-a-D-mannopyranosyl-(1→2)-a-D-mannopyranoside	0	0	0	0	55.62	61.7	61.82	61.83	67.61	67.9	68.11	70.56	71.09	71.57	73.45	73.69	74.2	77.13	77.99	79.16	99.47	100.22	100.78	B	A	A	A	A	C	C	C	A	A	A	A	A	C	C	C	B	B	[26]
68	O-b-D-N-Acetyl glucosaminepyranosyl-(1→6)-O-b-D-galactopyranosyl-(1→4)-b-D-glucose	0	0	0	25.019	58.196	62.749	63.382	70.94	71.136	72.564	73.515	75.059	76.231	76.492	76.563	77.049	77.408	78.544	81.651	98.416	103.752	105.697	177.356	B	B	B	D	C	A	B	A	A	B	B	A	D	C	A	B	A	A	[27]
69	O-b-D-N-acetyl glucosaminepyranosyl-(1→6)-O-b-D-galactopyranosyl-(1→4)-a-D-glucose	0	0	0	0	0	62.7	63.65	71.14	71.31	71.67	72.68	73.48	73.48	73.71	74.3	75.12	75.29	76.64	77.75	81.9	94.98	105.77	106.01	B	B	A	D	C	A	B	A	A	B	B	B	D	C	A	B	A	A	[27]

## Sheet: TABLE S3
TABLE S3. Data set, classification of the anomeric configurations, type of linkages, residues and chain type of 204 di- and trisaccharides
	and RF di- and trisaccharide predictions for the training set in OOB estimation using 1D 13C NMR descriptors.
		Spectral 13C NMR descriptors																							Classification									RF OOB di- and trisaccharides predictions
ID	Chemical name	C1	C2	C3	C4	C5	C6	C7	C8	C9	C10	C11	C12	C13	C14	C15	C16	C17	C18	C19	C20	C21	C22	C23	Ano_F	Ano_S	Ano_R	F_Link	S_Link	Red_end	M_residue	F_Residue	Chain_Type	Ano_F	Ano_S	Ano_R	F_Link	S_Link	Red_end	M_residue	F_Residue	Chain_Type	References
1	4-O-b-D-Glucopyranosyl-b-D-glucose	0	0	0	0	0	0	0	0	0	0	0	61.28	61.67	70.53	74.14	74.98	75.3	75.62	76.6	76.9	79.9	96.67	103.36	B	X	B	X	C	A	X	A	X	B	X	B	X	C	A	X	A	X	[7]
2	4-O-a-D-Glucopyranosyl-b-D-glucose	0	0	0	0	0	0	0	0	0	0	0	61.6	61.79	70.41	72.64	73.61	73.84	75.05	75.54	77.03	78.32	96.7	100.58	A	X	B	X	C	A	X	A	X	A	X	B	X	C	A	X	A	X	[7]
3	4-O-a-D-Glucopyranosyl-a-D-glucose	0	0	0	0	0	0	0	0	0	0	0	61.59	61.76	70.44	70.97	72.26	72.72	73.6	73.89	74.03	78.47	92.79	100.65	A	X	A	X	C	A	X	A	X	A	X	A	X	C	A	X	A	X	[7]
4	6-O-b-D-Glucopyranosyl-a-D-glucose	0	0	0	0	0	0	0	0	0	0	0	61.86	69.65	70.59	70.7	71.43	72.41	73.7	74.08	76.74	76.78	93.07	103.62	B	X	A	X	D	A	X	A	X	B	X	A	X	D	A	X	A	X	[7]
5	6-O-a-D-Glucopyranosyl-b-D-glucose	0	0	0	0	0	0	0	0	0	0	0	61.6	66.85	70.55	70.61	72.41	72.74	74.1	75.16	75.2	76.92	96.94	98.84	A	X	B	X	D	A	X	A	X	A	X	B	X	D	A	X	A	X	[7]
6	3-O-b-D-Glucopyranosyl-b-D-glucose	0	0	0	0	0	0	0	0	0	0	0	61.72	61.82	69.25	70.57	74.4	74.72	76.42	76.57	76.92	85.93	96.57	103.64	B	X	B	X	B	A	X	A	X	B	X	B	X	B	A	X	A	X	[7]
7	3-O-b-D-Glucopyranosyl-a-D-glucose	0	0	0	0	0	0	0	0	0	0	0	61.64	61.88	69.16	70.58	71.85	72.2	74.42	76.6	76.89	83.42	92.84	103.67	B	X	A	X	B	A	X	A	X	B	X	A	X	B	A	X	A	X	[7]
8	3-O-a-D-Glucopyranosyl-a-D-glucose	0	0	0	0	0	0	0	0	0	0	0	61.48	61.72	70.56	70.86	71.07	72.14	72.66	72.81	73.91	81.19	93.1	99.95	A	X	A	X	B	A	X	A	X	A	X	A	X	B	A	X	A	X	[7]
9	2-O-b-D-Glucopyranosyl-b-D-glucose	0	0	0	0	0	0	0	0	0	0	0	61.74	61.76	70.54	70.56	74.58	76.61	76.63	76.77	76.93	82.49	95.44	103.38	B	X	B	X	A	A	X	A	X	B	X	B	X	A	A	X	A	X	[7]
10	2-O-b-D-Glucopyranosyl-a-D-glucose	0	0	0	0	0	0	0	0	0	0	0	61.78	61.83	70.57	70.6	72.08	72.68	74.25	76.65	76.76	81.34	92.61	104.59	B	X	A	X	A	A	X	A	X	B	X	A	X	A	A	X	A	X	[7]
11	2-O-a-D-Glucopyranosyl-b-D-glucose	0	0	0	0	0	0	0	0	0	0	0	61.48	61.86	70.5	70.88	72.32	72.62	73.77	75.39	76.55	79.88	97.35	98.64	A	X	B	X	A	A	X	A	X	A	X	B	X	A	A	X	A	X	[7]
12	2-O-a-D-Mannopyranosyl-D-b-mannose	0	0	0	0	0	0	0	0	0	0	0	61.55	62.02	67.63	68.34	71.49	72.24	73.64	74.72	77.25	79.83	93.79	103.67	A	X	B	X	A	C	X	C	X	B	X	B	X	A	C	X	A	X	[7]
13	2-O-a-D-Mannopyranosyl-D-a-mannose	0	0	0	0	0	0	0	0	0	0	0	61.95	62.1	67.87	68.16	70.87	70.9	71.33	73.41	74.13	79.93	93.53	102.99	A	X	A	X	A	C	X	C	X	A	X	A	X	B	C	X	C	X	[7]
14	2-O-b-D-Mannopyranosyl-D-b-mannose	0	0	0	0	0	0	0	0	0	0	0	61.78	61.84	67.44	68.17	71.29	73.14	73.67	77.06	77.23	80.26	94.73	101.87	B	X	B	X	A	C	X	C	X	B	X	B	X	B	C	X	C	X	[7]
15	2-O-b-D-Mannopyranosyl-D-a-mannose	0	0	0	0	0	0	0	0	0	0	0	61.63	61.79	67.47	68.2	70.37	70.58	73.33	73.71	77.12	79.23	93.05	100.37	B	X	A	X	A	C	X	C	X	A	X	A	X	B	B	X	C	X	[7]
16	3-O-a-D-Mannopyranosyl-D-b-mannose	0	0	0	0	0	0	0	0	0	0	0	61.81	62	66.95	67.8	70.97	71.37	71.72	74.14	77.18	81.63	94.49	102.97	A	X	B	X	B	C	X	C	X	B	X	A	X	B	C	X	C	X	[7]
17	3-O-a-D-Mannopyranosyl-D-a-mannose	0	0	0	0	0	0	0	0	0	0	0	61.81	62	67.2	67.8	70.97	71.28	71.37	73.52	74.14	78.85	94.88	102.97	A	X	A	X	B	C	X	C	X	A	X	A	X	B	C	X	C	X	[7]
18	3-O-b-D-Mannopyranosyl-D-a-mannose	0	0	0	0	0	0	0	0	0	0	0	61.94	62	66.5	67.72	71.2	71.4	72.95	73.88	77.21	80.06	94.76	101.3	B	X	A	X	B	C	X	C	X	A	X	B	X	B	C	X	C	X	[7]
19	4-O-a-D-Mannopyranosyl-D-b-mannose	0	0	0	0	0	0	0	0	0	0	0	61.74	61.91	67.67	71.36	71.92	71.94	74.28	74.57	75.45	75.6	94.35	102.6	A	X	B	X	C	C	X	C	X	A	X	B	X	C	C	X	C	X	[7]
20	4-O-a-D-Mannopyranosyl-D-a-mannose	0	0	0	0	0	0	0	0	0	0	0	61.74	61.91	67.67	71.36	71.48	71.5	71.94	71.94	74.57	75.7	94.74	102.6	A	X	A	X	C	C	X	C	X	A	X	A	X	C	C	X	C	X	[7]
21	6-O-a-D-Mannopyranosyl-D-b-mannose	0	0	0	0	0	0	0	0	0	0	0	61.8	66.57	67.3	67.7	70.8	71.5	72.08	73.6	73.97	75.15	94.6	100.3	A	X	B	X	D	C	X	C	X	A	X	A	X	D	C	X	C	X	[7]
22	6-O-a-D-Mannopyranosyl-D-a-mannose	0	0	0	0	0	0	0	0	0	0	0	61.8	66.57	67.55	67.7	70.8	71.19	71.49	71.5	71.64	73.6	94.99	100.3	A	X	A	X	D	C	X	C	X	A	X	A	X	D	C	X	C	X	[7]
23	6-O-b-D-Mannopyranosyl-D-b-mannose	0	0	0	0	0	0	0	0	0	0	0	62.04	67.73	67.88	69.67	71.28	72.09	73.97	74.01	76.06	77.18	94.61	101.48	B	X	B	X	D	C	X	C	X	B	X	B	X	D	C	X	C	X	[7]
24	6-O-b-D-Mannopyranosyl-D-a-mannose	0	0	0	0	0	0	0	0	0	0	0	62.04	67.88	67.98	69.67	71.23	71.28	71.65	72.4	73.97	77.18	95	101.48	B	X	A	X	D	C	X	C	X	B	X	A	X	D	C	X	C	X	[7]
25	2-O-a-D-Glucopyranosyl-b-D-galactose	0	0	0	0	0	0	0	0	0	0	0	61.48	61.86	69.86	70.5	72.32	72.41	72.62	73.77	75.72	77.64	97.88	98.64	A	X	B	X	A	B	X	A	X	A	X	B	X	A	A	X	A	X	[7]
26	2-O-a-D-Glucopyranosyl-a-D-galactose	0	0	0	0	0	0	0	0	0	0	0	61.51	62	68.5	70.26	70.54	71.16	72.26	72.85	73.76	73.98	90.42	97.57	A	X	A	X	A	B	X	A	X	A	X	A	X	A	A	X	A	X	[7]
27	2-O-b-D-Glucopyranosyl-b-D-galactose	0	0	0	0	0	0	0	0	0	0	0	61.74	61.76	69.54	70.54	73.79	74.58	75.78	76.63	76.93	80.25	95.97	103.38	B	X	B	X	A	B	X	A	X	B	X	B	X	A	A	X	A	X	[7]
28	2-O-b-D-Glucopyranosyl-a-D-galactose	0	0	0	0	0	0	0	0	0	0	0	61.83	61.98	69.03	70.17	70.57	71.01	74.25	76.65	76.76	78.22	92.8	104.59	B	X	A	X	A	B	X	A	X	B	X	A	X	A	B	X	A	X	[7]
29	3-O-a-D-Glucopyranosyl-b-D-galactose	0	0	0	0	0	0	0	0	0	0	0	61.55	61.81	66.1	70.58	71.33	72.2	72.74	73.84	75.7	78.92	96.04	97.38	A	X	B	X	B	B	X	A	X	A	X	B	X	B	A	X	A	X	[7]
30	3-O-a-D-Glucopyranosyl-a-D-galactose	0	0	0	0	0	0	0	0	0	0	0	61.55	62.01	66.69	67.72	70.58	71.07	72.2	72.74	73.84	75.27	93.19	96.04	A	X	A	X	B	B	X	A	X	A	X	A	X	B	B	X	C	X	[7]
31	3-O-b-D-Glucopyranosyl-b-D-galactose	0	0	0	0	0	0	0	0	0	0	0	61.64	61.76	69.36	70.51	72	74.34	75.63	76.62	76.72	83.64	97.27	104.43	B	X	B	X	B	B	X	A	X	B	X	B	X	B	A	X	A	X	[7]
32	3-O-b-D-Glucopyranosyl-a-D-galactose	0	0	0	0	0	0	0	0	0	0	0	61.64	61.96	68.39	69.95	70.51	71	74.34	76.62	76.72	79.99	93.08	104.43	B	X	A	X	B	B	X	A	X	B	X	A	X	A	B	X	A	X	[7]
33	4-O-a-D-Glucopyranosyl-b-D-galactose	0	0	0	0	0	0	0	0	0	0	0	61.15	61.42	70.51	72.69	73.05	73.21	73.45	73.67	76.31	79.2	97.42	101.06	A	X	B	X	C	B	X	A	X	A	X	B	X	C	A	X	A	X	[7]
34	4-O-a-D-Glucopyranosyl-a-D-galactose	0	0	0	0	0	0	0	0	0	0	0	61.35	61.42	69.6	69.8	70.51	71.68	72.69	73.05	73.67	79.79	93.23	101.06	A	X	A	X	C	B	X	A	X	A	X	A	X	C	B	X	B	X	[7]
35	4-O-b-D-Glucopyranosyl-b-D-galactose	0	0	0	0	0	0	0	0	0	0	0	61.58	61.8	70.66	73.43	74.18	74.69	75.38	76.8	76.8	78.68	97.39	104.62	B	X	B	X	C	B	X	A	X	B	X	B	X	C	A	X	A	X	[7]
36	4-O-b-D-Glucopyranosyl-a-D-galactose	0	0	0	0	0	0	0	0	0	0	0	61.78	61.8	69.82	70.53	70.66	70.75	74.69	76.8	76.8	79.27	93.2	104.62	B	X	A	X	C	B	X	A	X	B	X	A	X	C	B	X	A	X	[7]
37	6-O-a-D-Glucopyranosyl-b-D-galactose	0	0	0	0	0	0	0	0	0	0	0	61.63	67.42	69.74	70.63	72.24	72.82	72.94	73.72	73.88	74.05	97.38	99.03	A	X	B	X	D	B	X	A	X	A	X	B	X	D	A	X	A	X	[7]
38	6-O-a-D-Glucopyranosyl-a-D-galactose	0	0	0	0	0	0	0	0	0	0	0	61.63	67.62	69.25	69.33	70.07	70.33	70.63	72.24	72.82	74.05	93.19	99.03	A	X	A	X	D	B	X	A	X	A	X	A	X	D	B	X	B	X	[7]
39	6-O-b-D-Glucopyranosyl-b-D-galactose	0	0	0	0	0	0	0	0	0	0	0	61.89	69.63	69.7	70.74	72.91	73.6	74.09	74.69	76.76	76.81	97.49	103.57	B	X	B	X	D	B	X	A	X	B	X	B	X	D	A	X	A	X	[7]
40	6-O-b-D-Glucopyranosyl-a-D-galactose	0	0	0	0	0	0	0	0	0	0	0	61.89	69.3	69.83	69.95	70.06	70.29	70.74	74.09	76.76	76.81	93.3	103.57	B	X	A	X	D	B	X	A	X	B	X	A	X	D	B	X	B	X	[7]
41	6-O-a-D-Galactopyranosyl-b-D-glucose	0	0	0	0	0	0	0	0	0	0	0	61.8	66.85	69.29	70.18	70.45	70.55	71.67	75.16	75.2	76.92	96.94	99.03	A	X	B	X	D	A	X	B	X	A	X	B	X	D	A	X	B	X	[7]
42	6-O-a-D-Galactopyranosyl-a-D-glucose	0	0	0	0	0	0	0	0	0	0	0	61.85	67.09	69.31	70.24	70.46	70.7	70.88	71.7	72.43	73.99	93.04	99.04	A	X	A	X	D	A	X	B	X	A	X	A	X	D	B	X	B	X	[7]
43	6-O-b-D-Galactopyranosyl-b-D-glucose	0	0	0	0	0	0	0	0	0	0	0	61.83	69.54	69.65	70.61	71.78	73.74	75.14	75.82	75.95	76.7	96.89	104.17	B	X	B	X	D	A	X	B	X	B	X	B	X	D	A	X	A	X	[7]
44	6-O-b-D-Galactopyranosyl-a-D-glucose	0	0	0	0	0	0	0	0	0	0	0	61.86	69.65	69.68	70.59	71.43	71.84	72.41	73.7	73.8	75.91	93.07	104.15	B	X	A	X	D	A	X	B	X	B	X	A	X	D	A	X	B	X	[7]
45	2-O-a-D-Galactopyranosyl-b-D-glucose	0	0	0	0	0	0	0	0	0	0	0	61.68	61.86	69.2	70.07	70.12	70.88	71.55	75.39	76.55	79.88	97.35	98.83	A	X	B	X	A	A	X	B	X	A	X	B	X	A	B	X	B	X	[7]
46	2-O-a-D-Galactopyranosyl-a-D-glucose	0	0	0	0	0	0	0	0	0	0	0	61.71	61.8	69.14	70.11	70.11	70.69	71.78	72.15	72.23	77.1	90.23	97.76	A	X	A	X	A	A	X	B	X	A	X	A	X	A	B	X	B	X	[7]
47	2-O-b-D-Galactopyranosyl-b-D-glucose	0	0	0	0	0	0	0	0	0	0	0	61.74	61.76	69.52	70.56	72.34	73.65	76.1	76.61	76.77	82.49	95.44	103.91	B	X	B	X	A	A	X	B	X	B	X	B	X	A	A	X	A	X	[7]
48	2-O-b-D-Galactopyranosyl-a-D-glucose	0	0	0	0	0	0	0	0	0	0	0	61.78	61.83	69.55	70.6	72.01	72.08	72.68	73.67	75.93	81.34	92.61	105.12	B	X	A	X	A	A	X	B	X	B	X	A	X	A	A	X	B	X	[7]
49	2-O-a-D-Galactopyranosyl-b-D-galactose	0	0	0	0	0	0	0	0	0	0	0	61.68	61.86	69.2	69.86	70.07	70.12	71.55	72.41	75.72	77.64	97.88	98.83	A	X	B	X	A	B	X	B	X	A	X	B	X	A	B	X	B	X	[7]
50	2-O-a-D-Galactopyranosyl-a-D-galactose	0	0	0	0	0	0	0	0	0	0	0	61.71	62	68.5	69.14	70.11	70.11	70.26	71.16	71.78	73.98	90.42	97.76	A	X	A	X	A	B	X	B	X	A	X	A	X	A	B	X	B	X	[7]
51	2-O-b-D-Galactopyranosyl-b-D-galactose	0	0	0	0	0	0	0	0	0	0	0	61.74	61.76	69.52	69.54	72.34	73.65	73.79	75.78	76.1	80.25	95.97	103.91	B	X	B	X	A	B	X	B	X	B	X	B	X	A	B	X	B	X	[7]
52	2-O-b-D-Galactopyranosyl-a-D-galactose	0	0	0	0	0	0	0	0	0	0	0	61.83	61.98	69.03	69.55	70.17	71.01	72.01	73.67	75.93	78.22	92.8	105.12	B	X	A	X	A	B	X	B	X	B	X	A	X	A	B	X	B	X	[7]
53	3-O-a-D-Galactopyranosyl-b-D-galactose	0	0	0	0	0	0	0	0	0	0	0	61.75	61.81	66.1	69.08	70.15	70.19	71.33	71.67	75.7	78.92	96.23	97.38	A	X	B	X	B	B	X	B	X	A	X	B	X	B	B	X	C	X	[7]
54	3-O-a-D-Galactopyranosyl-a-D-galactose	0	0	0	0	0	0	0	0	0	0	0	61.75	62.01	66.69	67.72	69.08	70.15	70.19	71.07	71.67	75.27	93.19	96.23	A	X	A	X	B	B	X	B	X	A	X	A	X	B	B	X	C	X	[7]
55	3-O-b-D-Galactopyranosyl-b-D-galactose	0	0	0	0	0	0	0	0	0	0	0	61.64	61.76	69.36	69.49	72	72.1	73.64	75.63	75.89	83.64	97.27	104.96	B	X	B	X	B	B	X	B	X	B	X	B	X	B	B	X	B	X	[7]
56	3-O-b-D-Galactopyranosyl-a-D-galactose	0	0	0	0	0	0	0	0	0	0	0	61.64	61.96	68.39	69.49	69.95	71	72.1	73.64	75.89	79.99	93.08	104.96	B	X	A	X	B	B	X	B	X	B	X	A	X	B	B	X	B	X	[7]
57	4-O-a-D-Galactopyranosyl-b-D-galactose	0	0	0	0	0	0	0	0	0	0	0	61.15	61.62	69.57	70.02	70.08	71.98	73.21	73.45	76.31	79.2	97.42	101.25	A	X	B	X	C	B	X	B	X	A	X	B	X	C	B	X	A	X	[7]
58	4-O-a-D-Galactopyranosyl-a-D-galactose	0	0	0	0	0	0	0	0	0	0	0	61.35	61.62	69.57	69.6	69.8	70.02	70.08	71.68	71.98	79.79	93.23	101.25	A	X	A	X	C	B	X	B	X	A	X	A	X	C	B	X	B	X	[7]
59	4-O-b-D-Galactopyranosyl-b-D-galactose	0	0	0	0	0	0	0	0	0	0	0	61.58	61.8	69.64	72.45	73.43	73.82	74.18	75.38	75.97	78.68	97.39	105.15	B	X	B	X	C	B	X	B	X	B	X	B	X	C	A	X	A	X	[7]
60	4-O-b-D-Galactopyranosyl-a-D-galactose	0	0	0	0	0	0	0	0	0	0	0	61.78	61.8	69.64	69.82	70.53	70.75	72.45	73.82	75.97	79.27	93.2	105.15	B	X	A	X	C	B	X	B	X	B	X	A	X	C	B	X	B	X	[7]
61	6-O-a-D-Galactopyranosyl-b-D-galactose	0	0	0	0	0	0	0	0	0	0	0	61.83	67.42	69.12	69.74	70.2	70.4	71.75	72.94	73.72	73.88	97.38	99.22	A	X	B	X	D	B	X	B	X	A	X	A	X	D	B	X	B	X	[7]
62	6-O-a-D-Galactopyranosyl-a-D-galactose	0	0	0	0	0	0	0	0	0	0	0	61.83	67.62	69.12	69.25	69.33	70.07	70.2	70.33	70.4	71.75	93.19	99.22	A	X	A	X	D	B	X	B	X	A	X	A	X	D	B	X	B	X	[7]
63	6-O-b-D-Galactopyranosyl-b-D-galactose	0	0	0	0	0	0	0	0	0	0	0	61.89	69.63	69.7	69.72	71.85	72.91	73.6	73.78	74.69	75.98	97.49	104.1	B	X	B	X	D	B	X	B	X	B	X	B	X	D	B	X	B	X	[7]
64	6-O-b-D-Galactopyranosyl-a-D-galactose	0	0	0	0	0	0	0	0	0	0	0	61.89	69.3	69.72	69.83	69.95	70.06	70.29	71.85	73.78	75.98	93.3	104.1	B	X	A	X	D	B	X	B	X	B	X	A	X	D	B	X	B	X	[7]
65	2-O-a-D-Glucopyranosyl-b-D-mannose	0	0	0	0	0	0	0	0	0	0	0	61.4	62.02	68.34	70.4	72.67	73.02	74.02	74.72	77.25	79.83	93.79	101.72	A	X	B	X	A	C	X	A	X	A	X	B	X	A	C	X	A	X	[7]
66	2-O-a-D-Glucopyranosyl-a-D-mannose	0	0	0	0	0	0	0	0	0	0	0	61.72	62.01	68.32	70.69	71.22	72.73	73.25	73.35	73.82	81.02	93.57	101.69	A	X	A	X	A	C	X	A	X	A	X	A	X	B	C	X	A	X	[7]
67	3-O-a-D-Glucopyranosyl-b-D-mannose	0	0	0	0	0	0	0	0	0	0	0	61.64	61.91	66.94	70.64	71.92	72.64	73.24	73.84	77.09	82.01	94.04	101.64	A	X	B	X	B	C	X	A	X	A	X	B	X	B	C	X	A	X	[7]
68	3-O-a-D-Glucopyranosyl-a-D-mannose	0	0	0	0	0	0	0	0	0	0	0	61.64	61.91	67.19	70.64	71.48	72.64	73.24	73.43	73.84	79.23	94.43	101.64	A	X	A	X	B	C	X	A	X	A	X	A	X	B	C	X	A	X	[7]
69	3-O-b-D-Glucopyranosyl-b-D-mannose	0	0	0	0	0	0	0	0	0	0	0	61.64	62.03	66.14	70.58	71.51	74.42	76.6	76.83	76.89	83.67	94.4	103.67	B	X	B	X	B	C	X	A	X	B	X	B	X	B	C	X	A	X	[7]
70	3-O-b-D-Glucopyranosyl-a-D-mannose	0	0	0	0	0	0	0	0	0	0	0	61.64	62.03	66.39	70.58	71.07	73.17	74.42	76.6	76.89	80.89	94.79	103.67	B	X	A	X	B	C	X	A	X	B	X	B	X	B	C	X	A	X	[7]
71	4-O-a-D-Glucopyranosyl-b-D-mannose	0	0	0	0	0	0	0	0	0	0	0	61.59	61.91	70.44	71.92	72.72	73.6	73.89	74.28	75.45	75.6	94.35	100.65	A	X	B	X	C	C	X	A	X	A	X	B	X	C	C	X	A	X	[7]
72	4-O-a-D-Glucopyranosyl-a-D-mannose	0	0	0	0	0	0	0	0	0	0	0	61.59	61.91	70.44	71.48	71.5	71.94	72.72	73.6	73.89	75.7	94.74	100.65	A	X	A	X	C	C	X	A	X	A	X	A	X	C	C	X	A	X	[7]
73	6-O-a-D-Glucopyranosyl-b-D-mannose	0	0	0	0	0	0	0	0	0	0	0	61.65	67.24	67.68	70.67	72.09	72.43	72.77	74.11	74.24	75.51	94.6	98.85	A	X	B	X	D	C	X	A	X	A	X	B	X	D	C	X	A	X	[7]
74	6-O-a-D-Glucopyranosyl-a-D-mannose	0	0	0	0	0	0	0	0	0	0	0	61.65	67.24	67.93	70.67	71.46	71.65	71.85	72.43	72.77	74.11	94.99	98.85	A	X	A	X	D	C	X	A	X	A	X	A	X	D	C	X	A	X	[7]
75	6-O-b-D-Glucopyranosyl-b-D-mannose	0	0	0	0	0	0	0	0	0	0	0	61.86	67.57	69.8	70.7	72.07	73.95	74.08	76.06	76.74	76.78	94.63	103.62	B	X	B	X	D	C	X	A	X	B	X	B	X	D	A	X	A	X	[7]
76	6-O-b-D-Glucopyranosyl-a-D-mannose	0	0	0	0	0	0	0	0	0	0	0	61.86	67.82	69.8	70.7	71.17	71.63	72.4	74.08	76.74	76.78	95.02	103.62	B	X	A	X	D	C	X	A	X	B	X	A	X	D	A	X	A	X	[7]
77	3-O-a-D-Mannopyranosyl-D-b-galactose	0	0	0	0	0	0	0	0	0	0	0	61.7	61.81	66.1	67.81	71.31	71.33	71.42	73.71	75.7	78.92	97.38	97.99	A	X	B	X	B	B	X	C	X	A	X	B	X	B	B	X	C	X	[7]
78	3-O-a-D-Mannopyranosyl-D-a-galactose	0	0	0	0	0	0	0	0	0	0	0	61.7	62.01	66.69	67.72	67.81	71.07	71.31	71.42	73.71	75.27	93.19	97.99	A	X	A	X	B	B	X	C	X	A	X	A	X	B	B	X	B	X	[7]
79	3-O-b-D-Mannopyranosyl-D-b-galactose	0	0	0	0	0	0	0	0	0	0	0	61.76	61.79	67.49	69.36	71.27	72	73.89	75.63	76.96	83.64	97.27	102.14	B	X	B	X	B	B	X	C	X	B	X	B	X	B	A	X	C	X	[7]
80	3-O-b-D-Mannopyranosyl-D-a-galactose	0	0	0	0	0	0	0	0	0	0	0	61.79	61.96	67.49	68.39	69.95	71	71.27	73.89	76.96	79.99	93.08	102.14	B	X	A	X	B	B	X	C	X	B	X	A	X	B	B	X	C	X	[7]
81	6-O-a-D-Mannopyranosyl-D-b-galactose	0	0	0	0	0	0	0	0	0	0	0	61.92	66.72	67.76	69.57	70.95	71.64	72.94	73.65	73.99	74.3	97.44	100.49	A	X	B	X	D	B	X	C	X	A	X	B	X	D	B	X	C	X	[7]
82	6-O-a-D-Mannopyranosyl-D-a-galactose	0	0	0	0	0	0	0	0	0	0	0	61.92	66.92	67.76	69.33	69.67	70.16	70.34	70.95	71.64	73.65	93.25	100.49	A	X	A	X	D	B	X	C	X	A	X	A	X	D	B	X	B	X	[7]
83	6-O-b-D-Mannopyranosyl-D-b-galactose	0	0	0	0	0	0	0	0	0	0	0	62.04	67.88	69.52	69.73	71.28	72.92	73.76	73.97	74.99	77.18	97.43	101.48	B	X	B	X	D	B	X	C	X	B	X	B	X	D	B	X	C	X	[7]
84	6-O-b-D-Mannopyranosyl-D-a-galactose	0	0	0	0	0	0	0	0	0	0	0	62.04	67.88	69.31	69.72	70.11	70.32	70.36	71.28	73.97	77.18	93.24	101.48	B	X	A	X	D	B	X	C	X	B	X	A	X	D	B	X	B	X	[7]
85	2-O-a-D-Mannopyranosyl-D-b-glucose	0	0	0	0	0	0	0	0	0	0	0	61.84	61.86	67.67	70.84	71.16	71.36	73.7	75.43	76.64	80.18	97.31	100.59	A	X	B	X	A	A	X	C	X	A	X	B	X	B	A	X	C	X	[7]
86	2-O-a-D-Mannopyranosyl-D-a-glucose	0	0	0	0	0	0	0	0	0	0	0	61.78	61.84	67.64	70.62	71.15	71.26	72.22	72.23	73.75	76.18	90.07	98.46	A	X	A	X	A	A	X	C	X	A	X	A	X	A	A	X	C	X	[7]
87	2-O-b-D-Mannopyranosyl-D-b-glucose	0	0	0	0	0	0	0	0	0	0	0	61.8	61.97	67.68	70.63	71.37	73.92	76.66	76.66	77.26	81.86	95.71	101.04	B	X	B	X	A	A	X	C	X	B	X	B	X	B	A	X	C	X	[7]
88	2-O-b-D-Mannopyranosyl-D-a-glucose	0	0	0	0	0	0	0	0	0	0	0	61.78	61.98	67.55	70.6	71.18	72.08	72.68	73.92	77	81.34	92.61	102.3	B	X	A	X	A	A	X	C	X	B	X	A	X	A	C	X	C	X	[7]
89	3-O-a-D-Mannopyranosyl-D-b-glucose	0	0	0	0	0	0	0	0	0	0	0	61.68	61.8	67.69	70.97	71.22	71.42	73.74	73.98	76.54	83.37	96.85	101.62	A	X	B	X	B	A	X	C	X	A	X	B	X	B	A	X	C	X	[7]
90	3-O-a-D-Mannopyranosyl-D-a-glucose	0	0	0	0	0	0	0	0	0	0	0	61.68	61.8	67.69	70.97	71.22	71.25	71.42	72.15	73.74	80.39	93	101.62	A	X	A	X	B	A	X	C	X	A	X	A	X	B	A	X	C	X	[7]
91	3-O-b-D-Mannopyranosyl-D-b-glucose	0	0	0	0	0	0	0	0	0	0	0	61.85	61.94	67.72	69.27	71.4	73.88	74.71	76.37	77.21	85.57	96.66	101.3	B	X	B	X	B	A	X	C	X	B	X	B	X	B	A	X	C	X	[7]
92	3-O-b-D-Mannopyranosyl-D-a-glucose	0	0	0	0	0	0	0	0	0	0	0	61.85	61.94	67.72	69.27	71.4	71.98	71.98	73.88	77.21	82.59	92.81	101.3	B	X	A	X	B	A	X	C	X	B	X	A	X	A	C	X	C	X	[7]
93	6-O-a-D-Mannopyranosyl-D-b-glucose	0	0	0	0	0	0	0	0	0	0	0	61.92	66.72	67.76	70.59	70.95	71.64	73.65	75.13	75.18	76.97	96.91	100.49	A	X	B	X	D	A	X	C	X	A	X	B	X	D	A	X	C	X	[7]
94	6-O-a-D-Mannopyranosyl-D-a-glucose	0	0	0	0	0	0	0	0	0	0	0	61.92	66.72	67.76	70.59	70.74	70.95	71.64	72.45	73.65	73.99	93.06	100.49	A	X	A	X	D	A	X	C	X	A	X	A	X	D	A	X	C	X	[7]
95	6-O-b-D-Mannopyranosyl-D-b-glucose	0	0	0	0	0	0	0	0	0	0	0	62.04	67.88	69.52	70.75	71.28	73.97	75.16	75.82	76.74	77.18	96.9	101.48	B	X	B	X	D	A	X	C	X	B	X	B	X	D	A	X	C	X	[7]
96	6-O-b-D-Mannopyranosyl-D-a-glucose	0	0	0	0	0	0	0	0	0	0	0	62.04	67.88	69.52	70.75	71.28	71.43	72.43	73.76	73.97	77.18	93.05	101.48	B	X	A	X	D	A	X	C	X	B	X	A	X	D	A	X	C	X	[7]
97	4-O-a-D-Galactopyranosyl-b-D-glucose	0	0	0	0	0	0	0	0	0	0	0	61.79	61.8	69.52	69.98	70.19	72.54	75.05	75.54	77.03	78.32	96.7	100.77	A	X	B	X	C	A	X	B	X	A	X	B	X	A	B	X	B	X	[7]
98	4-O-a-D-Galactopyranosyl-a-D-glucose	0	0	0	0	0	0	0	0	0	0	0	61.76	61.79	69.6	70.01	70.24	70.97	72.26	72.53	74.03	78.47	92.79	100.84	A	X	A	X	C	A	X	B	X	A	X	A	X	C	B	X	B	X	[7]
99	Methyl 4-O-b-D-glucopyranosyl-b-D-glucopyranoside	0	0	0	0	0	0	0	0	0	0	57.91	61.26	61.67	70.53	73.77	74.14	75.32	75.64	76.6	76.9	79.88	103.36	103.96	B	X	B	X	C	A	X	A	X	B	X	B	X	C	A	X	A	X	[7]
100	Methyl 4-O-b-D-glucopyranosyl-a-D-glucopyranoside	0	0	0	0	0	0	0	0	0	0	56.01	61.07	61.65	70.51	71.16	71.98	72.59	74.13	76.58	76.88	79.88	99.92	103.29	B	X	A	X	C	A	X	A	X	B	X	B	X	C	A	X	A	X	[7]
101	Methyl 4-O-a-D-glucopyranosyl-a-D-glucopyranoside	0	0	0	0	0	0	0	0	0	0	55.97	61.59	61.59	70.44	71.12	72.02	72.72	73.6	73.89	74.35	78.44	99.99	100.65	A	X	A	X	C	A	X	A	X	A	X	B	X	C	A	X	A	X	[7]
102	Methyl 6-O-b-D-glucopyranosyl-a-D-glucopyranoside	0	0	0	0	0	0	0	0	0	0	56.16	61.86	69.48	70.56	70.7	71.58	72.17	74.02	74.08	76.74	76.78	100.27	103.62	B	X	A	X	D	A	X	A	X	B	X	A	X	D	A	X	A	X	[7]
103	Methyl 6-O-a-D-glucopyranosyl-b-D-glucopyranoside	0	0	0	0	0	0	0	0	0	0	57.95	61.6	66.83	70.53	70.61	72.41	72.74	73.99	74.1	75.18	76.94	98.84	104.23	A	X	B	X	D	A	X	A	X	B	X	B	X	D	A	X	A	X	[7]
104	Methyl 6-O-a-D-glucopyranosyl-a-D-glucopyranoside	0	0	0	0	0	0	0	0	0	0	56.09	61.65	66.92	70.67	70.67	71.03	72.19	72.43	72.77	74.11	74.31	98.85	100.24	A	X	A	X	D	A	X	A	X	A	X	A	X	D	A	X	A	X	[7]
105	Methyl 3-O-b-D-glucopyranosyl-b-D-glucopyranoside	0	0	0	0	0	0	0	0	0	0	57.93	61.72	61.8	69.23	70.57	73.51	74.4	76.44	76.57	76.92	85.95	103.64	103.86	B	X	B	X	B	A	X	A	X	B	X	B	X	B	A	X	A	X	[7]
106	Methyl 3-O-a-D-glucopyranosyl-b-D-glucopyranoside	0	0	0	0	0	0	0	0	0	0	57.91	61.47	61.65	70.5	70.87	72.6	72.71	72.83	73.91	76.46	83.93	99.94	104.15	A	X	B	X	B	A	X	A	X	A	X	A	X	B	A	X	A	X	[7]
107	Methyl 3-O-a-D-glucopyranosyl-a-D-glucopyranoside	0	0	0	0	0	0	0	0	0	0	55.92	61.48	61.55	70.56	70.83	70.83	72.29	72.66	72.81	73.91	81.51	99.95	100.3	A	X	A	X	B	A	X	A	X	A	X	A	X	B	A	X	A	X	[7]
108	Methyl 2-O-b-D-glucopyranosyl-a-D-glucopyranoside	0	0	0	0	0	0	0	0	0	0	55.7	61.61	61.83	70.57	70.57	72.23	73	74.25	76.65	76.76	81.1	99.81	104.59	B	X	A	X	A	A	X	A	X	B	X	B	X	A	A	X	A	X	[7]
109	Methyl 2-O-a-D-glucopyranosyl-b-D-glucopyranoside	0	0	0	0	0	0	0	0	0	0	57.97	61.48	61.84	70.5	70.86	72.32	72.62	73.77	75.41	76.57	78.67	98.64	104.64	A	X	B	X	A	A	X	A	X	A	X	B	X	A	A	X	A	X	[7]
110	Methyl 2-O-b-D-galactopyranosyl-b-D-glucopyranoside	0	0	0	0	0	0	0	0	0	0	57.71	61.74	61.74	69.52	70.54	72.34	73.65	76.1	76.63	76.79	81.28	102.73	103.91	B	X	B	X	A	A	X	A	X	B	X	B	X	A	A	X	B	X	[7]
111	Methyl 3-O-b-D-galactopyranosyl-a-D-glucopyranoside	0	0	0	0	0	0	0	0	0	0	55.92	61.64	61.71	69.13	69.56	71.61	72.18	72.35	73.62	76.06	83.74	100.04	104.2	B	X	A	X	B	A	X	A	X	B	X	B	X	B	B	X	B	X	[7]
112	Methyl 3-O-b-D-mannopyranosyl-b-D-mannopyranoside	0	0	0	0	0	0	0	0	0	0	57.61	61.94	62.03	66.45	67.72	70.61	71.4	73.88	76.71	77.21	82.74	101.3	101.71	B	X	B	X	B	C	X	C	X	B	X	A	X	B	C	X	C	X	[7]
113	Methyl a-D-mannopyranosyl-(1→2)-[b-D-galactopyranosyl-(1→3)]-b-D-glucopyranoside	0	0	0	0	58.2	62.3	62.3	62.3	68.1	69.9	70.2	71.4	71.6	72.6	74.2	74.3	76.5	76.7	77.6	83.9	100.6	104	104.7	A	B	B	A	B	A	B	C	B	B	B	B	A	B	A	A	B	B	[20]
114	Methyl b-D-galactopyranosyl-(1→2)-[b-D-galactopyranosyl-(1→3)]-b-D-glucopyranoside	0	0	0	0	58.2	62.1	62.2	62.2	69.9	70	70	72.6	72.9	74.1	74.2	76.4	76.6	76.6	80.4	85.9	103.5	104	104.1	B	B	B	A	B	A	B	B	B	B	B	B	A	B	A	A	A	B	[20]
115	Methyl b-D-galactopyranosyl-(1→2)-[b-D-mannopyranosyl-(1→3)]-b-D-glucopyranoside	0	0	0	0	58.3	62	62	62.3	68.2	69.9	71.4	71.4	71.7	72.8	74.3	74.4	76.4	76.6	79.7	81.3	101.2	103.7	103.7	B	B	B	A	B	A	C	B	B	A	B	B	A	B	A	A	C	B	[20]
116	Methyl a-L-rhamnopyranosyl-(1→2)-[a-D-mannopyranosyl-(1→3)]-b-D-glucopyranoside	0	0	0	0	17.9	58.6	62.3	62.7	68.2	70.4	71.6	71.7	71.9	71.9	71.9	73.5	75.2	77	80.4	83.2	102.2	102.9	103.7	A	A	B	A	B	A	C	D	B	B	A	B	A	B	A	C	C	B	[20]
117	Methyl b-L-fucopyranosyl-(1→2)-[a-D-mannopyranosyl-(1→3)]-b-D-glucopyranoside	0	0	0	0	16.9	58.7	61.8	62.2	68.4	71.2	71.5	71.5	72.2	72.4	72.9	73.3	74.1	76.8	77.9	77.9	100.6	103.5	105.1	B	A	B	A	B	A	C	E	B	B	B	B	A	C	A	E	C	B	[20]
118	Methyl a-D-mannopyranosyl-(1→2)-[a-L-fucopyranosyl-(1→3)]-b-D-glucopyranoside	0	0	0	0	16.5	58.2	62.3	62.4	68.2	68.2	69.4	70.1	70.9	71.6	71.6	73.2	75	76.8	80.3	81.6	100	101.5	104.5	A	A	B	A	B	A	E	C	B	A	A	B	A	C	A	B	C	B	[20]
119	Methyl b-L-fucopyranosyl-(1→2)-[a-L-rhamnopyranosyl-(1→3)]-b-D-glucopyranoside	0	0	0	0	16.7	17.7	58.6	62.2	69.8	70	71.4	71.6	71.9	72.4	72.8	73.4	74.1	77	81.1	81.4	102.2	104.1	104.7	B	A	B	A	B	A	D	E	B	A	B	B	A	B	A	E	E	B	[20]
120	Methyl a-D-mannopyranosyl-(1→2)-[b-L-fucopyranosyl-(1→3)]-b-D-glucopyranoside	0	0	0	0	17	58.5	62.1	62.4	68.6	71.4	71.6	71.8	71.8	72.8	73	73.5	74.4	75.2	76.9	81.3	100	104.4	105.4	A	B	B	A	B	A	E	C	B	B	A	B	A	B	A	C	D	B	[20]
121	Methyl a-L-fucopyranosyl-(1→2)-[b-L-fucopyranosyl-(1→3)]-b-D-glucopyranoside	0	0	0	0	16.4	16.5	58.3	62	68.1	70	71.3	71.4	72.4	72.4	72.6	73.1	74.3	76.5	80.3	83.7	101.5	103.8	104.4	A	B	B	A	B	A	E	E	B	B	B	B	A	B	A	E	E	B	[20]
122	Methyl b-L-fucopyranosyl-(1→2)-[b-L-fucopyranosyl-(1→3)]-b-D-glucopyranoside	0	0	0	0	16.6	16.7	58.3	62.2	70.9	71.4	72.1	72.2	72.5	72.6	72.6	74.2	74.2	76.6	77.6	80.1	102.3	102.5	104.8	B	B	B	A	B	A	E	E	B	B	B	B	A	B	A	E	E	B	[20]
123	Methyl a-L-fucopyranosyl-(1→2)-[a-L-fucopyranosyl-(1→3)]-b-D-glucopyranoside	0	0	0	0	16.3	16.3	58.1	62.2	68	68.3	69.4	69.5	70	70.8	70.8	73	73.1	76.5	80.9	85	100.4	100.6	103.6	A	A	B	A	B	A	E	E	B	A	A	A	A	C	E	E	E	B	[20]
124	Methyl b-L-fucopyranosyl-(1→2)-[b-L-fucopyranosyl-(1→3)]-a-D-glucopyranoside	0	0	0	0	16.6	16.6	56.1	61.9	70.7	71.1	71.9	72.5	72.5	72.5	72.5	72.5	74.1	74.1	74.8	79.6	99.3	102.3	103.6	B	B	A	A	B	A	E	E	B	B	B	B	A	C	B	E	E	B	[20]
125	Methyl a-L-fucopyranosyl-(1→2)-[b-L-fucopyranosyl-(1→3)]-b-D-galactopyranoside	0	0	0	0	16.4	16.5	58.3	62.2	67.1	68.1	70	71.2	71.8	72.5	72.5	73.2	74.3	75.7	77.6	80.7	101.5	101.5	104.1	A	B	B	A	B	B	E	E	B	A	B	B	A	C	A	E	E	B	[20]
126	Methyl b-L-fucopyranosyl-(1→2)-[b-L-fucopyranosyl-(1→3)]-b-D-galactopyranoside	0	0	0	0	16.7	16.7	58.4	62.2	67.9	71.1	72.1	72.5	72.5	72.6	72.6	74.1	74.1	75.7	76.3	76.7	101	103	105.2	B	B	B	A	B	B	E	E	B	B	B	B	A	B	A	E	E	B	[20]
127	O-b-D-Mannopyranosyl-(1→4)-O-b-D-mannopyranosyl-(1→4)-b-D-mannose	0	0	0	0	0	62	62	62.4	68.2	71.4	71.9	71.9	73	73	74.3	76.5	76.5	77.9	77.9	77.9	95.2	101.6	101.6	B	B	B	C	C	C	C	C	A	B	B	A	C	C	A	A	C	A	[21]
128	O-b-D-Mannopyranosyl-(1→4)-O-b-D-mannopyranosyl-(1→4)-a-D-glucose	0	0	0	0	0	62	62	62.4	68.4	71.5	71.5	72	72	73	73	74.3	76.5	77.9	77.9	80.6	93.4	101.5	101.7	B	B	A	C	C	A	C	C	A	B	B	B	C	C	C	C	C	A	[21]
129	O-b-D-Mannopyranosyl-(1→4)-O-b-D-glucopyranosyl-(1→4)-a-D-mannose	0	0	0	0	0	62	62	62.4	68.1	70.7	71.6	72	72.4	74.2	74.2	76	77	77	78.4	80.6	95.3	101.6	104.2	B	B	A	C	C	C	A	C	A	B	B	B	C	C	C	A	C	A	[21]
130	O-b-D-Mannopyranosyl-(1→4)-O-b-D-glucopyranosyl-(1→4)-b-D-mannose	0	0	0	0	0	62	62	62.4	68.1	72	72	73.6	74.2	74.2	76	76	77	77	78.4	80.6	95.3	101.6	104.2	B	B	B	C	C	C	A	C	A	B	B	B	C	C	C	A	C	A	[21]
131	Methyl a-D-glucopyranosyl-(1→3)-[b-D-glucopyranosyl-(1→4)]-a-D-galactopyranoside	0	0	0	0	56.03	61.6	61.71	61.99	67.84	70.66	70.92	71.05	72.57	72.6	74.01	74.39	74.69	75.66	76.62	76.85	96.43	100.49	103.58	A	B	A	B	C	B	A	A	B	B	A	B	A	C	C	A	A	B	[22]
132	Methyl b-D-glucopyranosyl-(1→3)-[a-D-glucopyranosyl-(1→4)]-a-D-galactopyranoside	0	0	0	0	56.02	61.06	61.3	61.86	68.82	70.31	70.76	72.3	72.41	72.83	73.64	74.48	76.74	76.77	77.59	79.06	100.04	100.28	105.12	B	A	A	B	C	B	A	A	B	B	B	B	A	C	B	A	A	B	[22]
133	Methyl b-D-glucopyranosyl-(1→3)-[b-D-glucopyranosyl-(1→4)]-a-D-galactopyranoside	0	0	0	0	56.02	61.71	61.95	61.95	68.54	70.79	70.84	70.96	74.52	74.52	76.61	76.65	76.83	76.87	77.26	79.76	100.31	103.29	104.77	B	B	A	B	C	B	A	A	B	B	B	B	A	C	A	A	A	B	[22]
134	Methyl a-L-fucopyranosyl-(1→3)-[a-L-fucopyranosyl-(1→4)]-a-D-galactopyranoside	0	0	0	0	16.13	16.13	56.06	62.08	67.84	68.11	69.2	69.38	69.48	70.54	70.65	72.49	72.64	72.67	75.3	78.27	99.42	100.46	101.35	A	A	A	B	C	B	E	E	B	A	A	A	A	C	B	E	E	B	[22]
135	Methyl a-L-fucopyranosyl-(1→3)-[b-L-fucopyranosyl-(1→4)]-a-D-galactopyranoside	0	0	0	0	16.06	16.74	56.08	60.95	67.62	69.37	69.43	70.34	71.54	72.17	72.27	72.39	72.81	73.79	75.1	77.49	100.4	100.95	104.08	A	B	A	B	C	B	E	E	B	A	A	A	B	C	B	E	E	B	[22]
136	O-a-D-Glucopyranosyl-(1→6)-O-a-D-glucpyranosyl-(1→4)-a-D-glucose	0	0	0	0	0	62.4	62.4	67.4	71.2	71.2	71.2	71.6	73.1	73.1	73.1	74.3	74.6	74.6	74.6	78.5	93.3	99.3	101.1	A	A	A	D	C	A	A	A	A	A	A	A	C	D	A	A	A	A	[23]
137	O-a-D-Glucopyranosyl-(1→6)-O-a-D-glucpyranosyl-(1→4)-b-D-glucose	0	0	0	0	0	62.4	62.4	67.4	71.2	71.2	71.2	73.1	73.1	74.3	74.6	74.6	75.4	75.8	77.7	78.5	97.2	99.3	101.1	A	A	B	D	C	A	A	A	A	A	A	B	D	C	A	A	A	A	[23]
138	O-a-D-Glucopyranosyl-(1→4)-O-a-D-glucpyranosyl-(1→6)-a-D-glucose	0	0	0	0	0	62.3	62.3	67.5	71	71	71.3	71.6	73	73.3	73.3	74.1	74.6	74.6	75	78.8	93.8	99.3	101.1	A	A	A	C	D	A	A	A	A	A	A	A	C	D	A	A	A	A	[23]
139	O-a-D-Glucopyranosyl-(1→4)-O-a-D-glucpyranosyl-(1→6)-b-D-glucose	0	0	0	0	0	62.3	62.3	67.5	71	71	71.6	73	73.3	74.1	74.6	75	75.8	75.8	77.7	78.8	97.7	99.3	101.1	A	A	B	C	D	A	A	A	A	A	A	B	C	C	A	A	A	A	[23]
140	O-b-D-Glucopyranosyl-(1→6)-O-b-D-glucpyranosyl-(1→6)-b-D-glucose	0	0	0	0	0	62.4	70	70.2	71	71.2	71.2	74.6	74.6	75.5	76.1	76.1	76.8	77.1	77.1	77.1	97.3	103.7	103.7	B	B	B	D	D	A	A	A	A	B	B	B	D	C	A	A	A	A	[23]
141	Methyl b-D-glucopyranosyl-(1→2)-[b-D-glucopyranosyl-(1→3)]-b-D-glucopyranoside	0	0	0	0	55.74	61.57	61.69	61.78	69.28	70.53	70.62	72.05	74.25	74.47	76.78	76.83	76.86	76.87	80.46	81.49	99.73	103.26	104.26	B	B	B	A	B	A	A	A	B	B	B	A	B	C	A	A	A	B	[24]
142	Methyl a-L-fucopyranosyl-(1→3)-[a-D-glucopyranosyl-(1→4)]-a-D-galactopyranoside	0	0	0	0	16.15	56.06	61.42	61.62	67.93	69.34	69.63	70.54	70.74	72.33	72.68	72.95	73.49	73.54	76.69	78.9	100.43	100.77	101.01	A	A	A	B	C	B	A	E	B	A	A	A	B	C	B	E	E	B	[25]
143	Methyl a-L-fucopyranosyl-(1→3)-[b-D-glucopyranosyl-(1→4)]-a-D-galactopyranoside	0	0	0	0	16.27	56.05	61.68	61.86	68.21	69.35	69.45	70.78	70.78	71.46	72.63	74.34	76.31	76.87	77.12	77.6	100.45	101.13	103.44	A	B	A	B	C	B	A	E	B	A	A	A	B	C	B	A	E	B	[25]
144	Methyl b-L-fucopyranosyl-(1→3)-[a-D-glucopyranosyl-(1→4)]-a-D-galactopyranoside	0	0	0	0	16.23	55.99	61.35	61.47	68.2	70.55	71.21	71.97	72.12	72.12	72.85	73.16	73.54	73.69	78.26	78.38	100.17	101.24	103.22	B	A	A	B	C	B	A	E	B	B	B	A	B	C	B	A	E	B	[25]
145	Methyl b-L-fucopyranosyl-(1→3)-[b-D-glucopyranosyl-(1→4)]-a-D-galactopyranoside	0	0	0	0	16.21	55.99	61.69	62	67.94	70.86	71.07	71.6	71.76	72.25	73.92	74.45	75.42	76.61	76.75	77.39	100.16	101.43	103.7	B	B	A	B	C	B	A	E	B	B	B	A	B	C	B	A	A	B	[25]
146	Methyl a-D-glucopyranosyl-(1→3)-[a-D-fucopyranosyl-(1→4)]-a-D-galactopyranoside	0	0	0	0	16.15	56.02	61.55	62.3	67.76	67.96	69.37	70.31	70.54	72.29	72.35	72.62	72.66	73.88	74.04	76.84	96.94	100.18	100.45	A	A	A	B	C	B	E	A	B	A	A	A	B	C	B	C	C	B	[25]
147	Methyl b-D-glucopyranosyl-(1→3)-[b-D-fucopyranosyl-(1→4)]-a-D-galactopyranoside	0	0	0	0	16.48	55.98	61.42	61.93	68.45	70.84	71.61	71.76	72.1	72.28	74.03	74.58	76.63	76.74	78.47	78.77	100.29	104.19	104.79	B	B	A	B	C	B	E	A	B	B	B	A	B	C	A	A	A	B	[25]
148	Methyl a-D-mannopyranosyl-(1→3)-[a-D-mannopyranosyl-(1→4)]-a-L-rhamnopyranoside	0	0	0	0	18.7	56.2	62.3	62.3	67.25	68.1	68.2	69.45	70.9	71.3	71.7	71.8	74.5	74.8	74.8	77.5	97.8	101.5	101.6	A	A	A	B	C	D	C	C	B	A	A	A	B	C	D	C	C	B	[25]
149	Methyl a-D-mannopyranosyl-(1→3)-[b-D-glucopyranosyl-(1→4)]-a-L-rhamnopyranoside	0	0	0	0	18.3	56.3	62.1	62.3	67	68.2	68.9	71.2	71.5	72.1	74.3	75	75.3	77.3	77.3	77.6	97.4	101.9	103.5	A	B	A	B	C	D	A	C	B	B	A	A	B	C	D	C	C	B	[25]
150	Methyl a-D-mannopyranosyl-(1→3)-[a-L-rhamnopyranosyl-(1→4)]-a-L-rhamnopyranoside	0	0	0	0	17.55	18.7	56	62.1	66.3	67.6	68.2	70.9	71.1	71.4	71.8	71.8	72.7	74.8	75.2	78.3	96.5	101.7	102.7	A	A	A	B	C	D	D	C	B	A	A	A	B	C	D	C	C	B	[25]
151	Methyl a-D-mannopyranosyl-(1→3)-[b-L-fucopyranosyl-(1→4)]-a-L-rhamnopyranoside	0	0	0	0	17	18.1	56.2	62.3	67.6	68.6	69.6	71.4	71.6	71.7	72.8	73	73.2	73.4	74.3	78.5	97.1	101.8	104.3	A	B	A	B	C	D	E	C	B	A	A	A	B	C	B	C	D	B	[25]
152	Methyl b-D-glucopyranosyl-(1→3)-[a-D-mannopyranosyl-(1→4)]-a-L-rhamnopyranoside	0	0	0	0	18.75	56.2	62.1	62.3	68.1	69	70.8	70.8	71.3	71.6	74.7	74.7	77.2	77.4	78.6	80.8	101.6	101.6	104.1	B	A	A	B	C	D	C	A	B	A	B	A	B	C	D	A	C	B	[25]
153	Methyl b-D-glucopyranosyl-(1→3)-[b-D-glucopyranosyl-(1→4)]-a-L-rhamnopyranoside	0	0	0	0	18.4	56.2	62.1	62.3	68.6	71	71.3	71.3	74.9	75.2	77.3	77.3	77.4	77.6	79.45	81.8	101.8	103.8	104.7	B	B	A	B	C	D	A	A	B	B	B	A	B	C	D	A	A	B	[25]
154	Methyl b-D-glucopyranosyl-(1→3)-[a-L-rhamnopyranosyl-(1→4)]-a-L-rhamnopyranoside	0	0	0	0	17.8	18.9	56.1	62.1	68.5	70.7	70.9	71.4	71.6	71.6	73.4	74.65	77.2	77.5	79.1	82.2	101.75	102.7	104.8	B	A	A	B	C	D	D	A	B	B	B	A	B	C	D	A	D	B	[25]
155	Methyl b-D-glucopyranosyl-(1→3)-[b-L-fucopyranosyl-(1→4)]-a-L-rhamnopyranoside	0	0	0	0	16.4	18	56	62.1	69.2	70.9	71.15	72.3	72.3	72.4	74.3	74.7	76.5	77.1	80.4	81	101.6	104.6	105.75	B	B	A	B	C	D	E	A	B	B	B	B	A	C	A	E	A	B	[25]
156	Methyl a-L-rhamnopyranosyl-(1→3)-[a-D-mannopyranosy-(1→4)]-a-L-rhamnopyranoside	0	0	0	0	17.8	18.7	56.1	62.4	67.9	69.2	70.4	71.4	71.6	71.6	71.6	71.7	73.4	74.8	78.9	79.9	101.8	102.1	103.7	A	A	A	B	C	D	C	D	B	A	A	A	B	C	D	D	D	B	[25]
157	Methyl a-L-rhamnopyranosyl-(1→3)-[b-D-glucopyranosy-(1→4)]-a-L-rhamnopyranoside	0	0	0	0	17.8	18.35	56.2	62.2	68.7	70.4	71.2	71.2	71.5	71.7	73.4	74.7	77.1	77.25	78.7	80.5	101.95	103.7	103.9	A	B	A	B	C	D	A	D	B	B	A	A	B	C	D	D	A	B	[25]
158	Methyl a-L-rhamnopyranosyl-(1→3)-[b-L-fucopyranosy-(1→4)]-a-L-rhamnopyranoside	0	0	0	0	16.9	17.9	18.1	56.1	69.3	70.3	71.3	71.3	71.6	72	72.6	72.8	73.5	74.3	76.5	81.4	101.8	102.8	104.8	A	B	A	B	C	D	E	D	B	B	A	A	B	C	D	D	E	B	[25]
159	Methyl b-L-fucopyranosyl-(1→3)-[a-D-mannopyranosy-(1→4)]-a-L-rhamnopyranoside	0	0	0	0	16.8	18.5	56.1	62.6	68.4	68.9	69.5	71.5	71.5	71.95	72.1	72.9	73.7	74.3	76.6	77	101.3	101.5	101.6	B	A	A	B	C	D	C	E	B	A	A	A	B	C	D	E	E	B	[25]
160	Methyl b-L-fucopyranosyl-(1→3)-[a-L-rhamnopyranosy-(1→4)]-a-L-rhamnopyranoside	0	0	0	0	16.7	17.8	18.7	56.1	68.4	68.9	70.7	71.45	71.6	72.1	72.1	72.8	73.3	74.3	78.3	79.25	101.7	101.9	102.8	B	A	A	B	C	D	D	E	B	B	B	A	B	C	D	E	E	B	[25]
161	Methyl b-L-fucopyranosyl-(1→3)-[b-L-fucopyranosy-(1→4)]-a-L-rhamnopyranoside	0	0	0	0	16.7	16.7	18.5	56.2	69.45	69.55	71.5	72	72.2	72.4	72.6	72.6	74.3	74.3	76.1	79.3	101.6	101.9	103.5	B	B	A	B	C	D	E	E	B	B	B	A	A	C	D	E	E	B	[25]
162	Methyl a-D-galactopyranosyl-(1→2)-O-a-D-mannopyranosyl-(1→4)-a-L-rhamnopyranoside	0	0	0	0	17.77	55.51	61.59	61.78	67.86	68.09	69.59	69.96	70.06	70.16	71.05	71.3	72.08	73.88	80.27	82.07	100.44	101.36	101.97	A	A	A	A	C	D	C	B	A	A	A	A	A	C	E	B	B	B	[26]
163	Methyl b-D-N-acetyl glucosaminepyranosyl-(1→2)-[a-D-glucopyranosy-(1→3)]-a-L-rhamnopyranoside	0	0	17.61	23.44	55.61	56.49	61.34	61.66	69.65	70.42	70.84	71.72	72.18	72.35	73.99	74.88	75.15	75.15	76.8	95.7	100.79	102.65	175.19	B	A	A	A	B	D	A	A	B	B	B	B	B	C	A	A	A	B	[26]
164	Methyl a-D-N-acetyl galactosaminepyranosyl-(1→2)-[b-D-N-acetyl glucosaminepyranosy-(1→3)]-a-L-rhamnopyranoside	17.54	22.88	23.08	50.8	55.74	56.68	61.81	61.87	68.4	69.36	69.9	71.08	71.3	72.73	74.97	75.49	76.72	78.59	96.8	98.74	103.5	175.21	175.26	A	B	A	A	B	D	A	B	B	B	B	A	A	C	E	B	A	A	[26]
165	O-b-D-N-Acetyl glucosaminepyranosyl-(1→6)-O-b-D-galactopyranosyl-(1→4)-a-D-glucose	0	0	0	25.019	58.196	62.566	63.382	70.94	71.136	72.564	72.699	73.515	73.91	74.115	75.059	76.231	76.492	78.544	81.512	94.492	103.752	105.697	177.356	B	B	A	D	C	A	B	A	A	B	B	B	D	C	A	B	A	A	[27]
166	O-b-D-N-Acetyl glucosaminepyranosyl-(1→6)-O-b-D-galactopyranosyl-(1→4)-b-D-glucose	0	0	0	0	0	62.7	63.65	71.14	71.31	71.67	73.48	73.48	75.12	75.29	76.46	76.64	77.22	77.34	77.75	82.14	98.34	105.77	106.01	B	B	B	D	C	A	B	A	A	B	B	B	D	C	A	A	A	A	[27]
167	O-b-D-Glucopyranosyl-(1→3)-O-b-D-glucopyranosyl-(1→4)-a-D-glucose	0	0	0	0	0	60.8	61.4	61.5	68.8	70.4	70.9	72	72.2	73.8	74.2	76.36	76.39	76.8	79.6	84.9	92.6	103.1	103.6	B	B	A	B	C	A	A	A	A	B	B	B	B	C	A	A	A	A	[28]
168	O-b-D-Glucopyranosyl-(1→3)-O-b-D-glucopyranosyl-(1→4)-b-D-glucose	0	0	0	0	0	60.9	61.4	61.5	68.8	70.4	73.8	74.2	74.7	75.1	75.6	76.36	76.39	76.8	79.5	84.9	96.6	103.1	103.6	B	B	B	B	C	A	A	A	A	B	B	B	B	C	A	A	A	A	[28]
169	Methyl O-b-D-Glucopyranosyl-(1→4)-O-b-D-glucopyranosyl-(1→4)-b-D-glucopyranoside	0	0	0	0	57.11	59.69	59.81	60.42	69.29	72.74	72.79	72.99	73.9	74.13	74.62	74.67	75.32	75.82	78.21	78.36	102.21	102.43	102.94	B	B	B	C	C	A	A	A	A	B	B	B	A	C	A	A	A	B	[29]
170	Methyl b-D-galactopyranosyl-(1→2)-[a-D-galactopyranosyl-(1→4)]-b-D-mannopyranoside	0	0	0	0	57.82	61.63	61.79	61.79	69.44	69.6	70.01	70.24	72.12	72.53	73.29	73.42	75.93	75.99	76.13	79.02	100.84	101.87	104.69	B	A	B	A	C	C	B	B	B	B	A	B	A	C	C	B	B	B	CASPER
171	Methyl a-D-galactopyranosyl-(1→2)-[a-D-galactopyranosyl-(1→4)]-b-D-mannopyranoside	0	0	0	0	57.66	61.6	61.79	61.97	69.6	69.9	69.97	70.01	70.24	70.37	71.6	72.53	74.87	75.95	76.3	78.59	100.84	100.93	101.91	A	A	B	A	C	C	B	B	B	A	A	B	A	C	C	C	B	B	CASPER
172	O-b-D-Galactopyranosyl-(1→2)-O-a-D-galactopyranosyl-(1→4)-b-D-mannose	0	0	0	0	0	61.73	61.83	61.91	69.14	69.55	69.9	71.92	72.01	72.24	73.67	74.28	75.45	75.6	75.93	78.47	94.35	100.46	105.12	B	A	B	A	C	C	B	B	A	B	A	A	A	C	B	A	B	A	CASPER
173	Methyl O-b-D-galactopyranosyl-(1→2)-O-a-D-galactopyranosyl-(1→2)-b-D-mannose	0	0	0	0	57.62	61.54	61.83	62.05	68.54	69.27	69.55	69.86	71.31	72.01	73.67	74.62	75.93	77.35	78.77	78.8	101.13	101.53	105.12	B	A	B	A	A	C	B	B	A	A	A	B	A	C	C	B	B	B	CASPER
174	O-b-D-galactopyranosyl-(1→2)-O-a-D-galactopyranosyl-(1→4)-b-L-fucose	0	0	0	0	0	16.27	61.83	61.96	69.18	69.55	70.02	71.4	71.92	72.01	72.19	72.82	73.67	75.93	78.4	81.73	96.62	101.83	105.12	B	A	B	A	A	E	B	B	A	B	A	B	A	C	A	E	E	B	CASPER
175	O-a-L-N-Acetyl rhamnosaminepyranosyl-(1→2)-O-b-D-galactopyranosyl-(1→4)-b-L-fucose	0	0	0	15.64	16.92	22.84	54.63	61.64	69.41	69.53	69.83	71.77	73.22	73.26	73.6	74.15	76.06	79.35	82.07	97.26	101.48	103.22	175.43	A	B	B	A	C	E	B	D	A	B	B	B	A	C	E	C	D	A	CASPER
176	Methyl O-a-L-rhamnopyranosyl-(1→4)-O-a-L-N-acetyl rhamnosaminepyranosy-(1→4)-b-L-fucopyranoside	0	0	16.64	17.34	17.37	22.84	54.61	57.9	68.41	70.11	70.26	70.36	71.29	71.32	72.21	73.08	74.54	81.37	82.2	101.95	103.05	104.49	175.43	A	A	B	C	C	E	D	D	A	B	A	B	C	C	E	D	D	A	CASPER
177	Methyl O-a-D-N-acetyl glucosaminepyranosyl-(1→6)-O-b-D-glucopyranosyl-(1→6)-b-D-mannopyranoside	0	0	22.87	54.94	57.84	61.54	66.87	67.77	69.83	70.54	71.04	71.16	72.06	72.88	73.85	74.08	75.14	76.16	76.94	97.62	101.97	103.72	175.13	A	B	B	D	D	C	A	A	A	B	B	B	D	D	A	A	A	A	CASPER
178	Methyl O-a-D-mannopyranosyl-(1→6)-O-b-D-glucopyranosyl-(1→6)-b-D-mannopyranoside	0	0	0	0	57.84	61.92	66.74	67.76	67.77	69.83	70.58	70.95	71.04	71.64	73.65	73.85	74.06	75.11	76.16	76.99	100.49	101.97	103.69	A	B	B	D	D	C	A	C	A	A	A	B	D	D	C	C	B	A	CASPER
179	Methyl O-a-D-N-acetyl galactosaminepyranosyl-(1→6)-O-b-D-galactopyranosyl-(1→6)-b-D-mannopyranoside	0	0	22.91	50.93	57.84	61.9	67.44	67.77	68.67	69.48	69.73	69.83	71.04	71.81	71.82	73.74	73.85	73.86	76.16	97.99	101.97	104.16	175.43	A	B	B	D	D	C	B	B	A	A	A	B	D	D	C	B	D	A	CASPER
180	Methyl O-b-L-rhamnopyranosyl-(1→4)-O-a-L-N-acetyl rhamnosaminepyranosy-(1→4)-b-L-fucopyranoside	0	0	16.64	16.85	17.38	22.84	54	57.9	68.42	68.56	70.26	71.18	71.32	72.59	73.01	73.63	74.54	81.37	83.26	101.22	101.77	104.49	175.43	B	A	B	C	C	E	D	D	A	A	A	B	C	C	E	D	D	A	CASPER
181	Methyl O-b-D-galactopyranosyl-(1→4)-O-a-L-rhamnopyranosy-(1→4)-b-D-mannopyranoside	0	0	0	0	17.65	57.63	61.48	61.76	68.52	69.58	70.99	71.25	71.75	72.57	72.61	73.79	75.75	76	76.18	82.17	101.65	101.78	104.55	B	A	B	C	C	C	D	B	A	B	A	B	A	C	D	C	D	B	CASPER
182	Methyl a-D-galactopyranosyl-(1→4)-[a-D-N-Acetyl glucopyranosy-(1→6)]-b-D-mannopyranoside	0	0	22.87	54.96	57.81	61.59	61.79	67.19	69.6	70.01	70.24	70.85	71.22	72.07	72.53	72.91	74.21	74.39	75.64	97.63	100.84	101.74	175.13	A	A	B	C	D	C	A	B	B	A	A	B	D	D	C	B	B	A	CASPER
183	Methyl a-D-galactopyranosyl-(1→4)-[a-D-mannopyranosyl-(1→6)]-b-D-mannopyranoside	0	0	0	0	57.8	61.79	61.8	66.52	67.7	69.6	70.01	70.24	70.8	70.84	71.5	72.53	73.6	73.85	74.12	75.26	100.3	100.84	101.74	A	A	B	C	D	C	C	B	B	A	A	B	D	C	C	C	B	B	CASPER
184	a-L-N-Acetyl rhamnosaminepyranosyl-(1→4)-[a-D-mannopyranosyl-(1→6)]-b-D-mannose	0	0	0	16.97	22.84	54.2	61.8	66.03	67.7	69.58	69.58	70.8	71.5	72.23	72.61	73.14	73.6	74.23	75.16	94.36	100.3	100.97	175.43	A	A	B	C	D	C	C	D	B	A	A	A	C	C	E	B	D	A	CASPER
185	a-D-Galactopyranosyl-(1→2)-[a-D-galactopyranosyl-(1→4)]-a-L-fucose	0	0	0	0	0	16.47	61.84	62.02	67.14	69.53	69.95	69.97	70.13	70.14	70.28	70.49	72.21	72.47	78.77	82.67	92.6	102.21	102.32	A	A	A	A	C	E	B	B	B	A	A	A	A	C	E	C	B	A	CASPER
186	a-D-Galactopyranosyl-(1→2)-[b-D-mannopyranosyl-(1→4)]-a-L-fucose	0	0	0	0	0	16.5	61.91	62.02	65.46	67.58	69.1	69.53	70.13	70.28	71.78	72.21	74.04	77.07	78.09	81.66	92.42	101.73	102.21	A	B	A	A	C	E	C	B	B	A	A	A	A	C	E	B	C	A	CASPER
187	Methyl b-D-galactopyranosyl-(1→2)-[a-D-mannopyranosyl-(1→4)]-a-D-mannopyranoside	0	0	0	0	55.72	61.48	61.64	61.74	67.67	69.47	70.93	71.36	71.41	71.94	72.04	73.46	74.57	75.81	76.05	78.18	99.66	102.6	103.19	B	A	A	A	C	C	C	B	B	A	A	B	B	C	B	C	B	B	CASPER
188	Methyl a-D-mannopyranosyl-(1→4)-[a-L-rhamnopyranosyl-(1→6)]-b-D-galactopyranoside	0	0	0	0	17.4	58.15	61.74	67.67	68.21	69.54	71.29	71.36	71.38	71.92	71.94	73.14	73.84	73.96	74.57	77.35	101.79	102.6	104.66	A	A	B	C	D	B	D	C	B	A	A	B	D	D	C	C	D	B	CASPER
189	a-L-Rhamnopyranosyl-(1→4)-[b-L-rhamnopyranosyl-(1→6)]-b-D-mannose	0	0	0	0	0	17.42	17.46	68.68	69.92	70.98	71.08	71.75	72.22	72.47	72.7	72.9	73.15	73.73	74.88	75.35	94.4	100.78	101.95	A	B	B	C	D	C	D	D	B	B	B	B	C	D	B	D	D	B	CASPER
190	b-L-Rhamnopyranosyl-(1→4)-[b-L-rhamnopyranosyl-(1→6)]-b-D-galactose	0	0	0	0	0	17.44	17.49	68.35	70.9	71.2	72.58	72.71	72.76	72.9	73.05	73.62	73.75	73.75	74.14	79.53	97.62	100.92	101.38	B	B	B	C	D	B	D	D	B	B	B	B	C	D	A	D	D	A	CASPER
191	O-b-L-N-Acetyl rhamnosaminepyranosyl-(1→2)-O-b-L-rhamnopyranosyl-(1→2)-b-L-fucose	0	0	0	16.24	17.02	17.42	22.98	54.2	71.38	72.29	72.55	72.58	72.66	72.84	73.2	73.31	73.44	79.9	80.46	95.29	99.91	101.64	176.39	B	B	B	A	A	E	D	D	A	B	B	B	A	B	E	D	D	A	CASPER
192	O-a-L-N-Acetyl rhamnopyranosyl-(1→2)-O-b-D-mannopyranosyl-(1→2)-b-L-fucose	0	0	0	16.29	17.02	22.84	54.8	61.73	67.76	69.73	69.8	71.54	72.27	73.15	73.15	73.83	77.38	79.39	80.61	96.02	101.33	102.89	175.43	A	B	B	A	A	E	C	D	A	A	B	B	A	C	E	B	D	A	CASPER
193	Methyl O-a-L-rhamnopyranosyl-(1→2)-O-b-L-rhamnopyranosyl-(1→2)-b-D-mannopyranoside	0	0	0	0	17.44	17.63	57.61	61.98	68.29	69.91	70.99	71.08	72.82	73.12	73.32	73.41	73.89	77.34	79.58	80.83	100.52	101.13	102.89	A	B	B	A	A	C	D	D	A	A	B	B	A	C	B	D	D	B	CASPER
194	Methyl O-a-D-N-acetyl galactosaminepyranosyl-(1→2)-O-a-D-galactopyranosyl-(1→2)-a-D-galactopyranoside	0	0	22.91	50.95	55.78	61.67	61.78	62.02	68.38	68.48	68.83	69.39	70.09	70.17	71.4	71.64	71.84	73.77	73.8	95	96.53	97.59	175.43	A	A	A	A	A	B	B	B	A	A	A	A	A	C	B	B	B	A	CASPER
195	Methyl O-a-D-galactopyranosyl-(1→2)-O-a-D-mannopyranosyl-(1→2)-a-D-galactopyranoside	0	0	0	0	55.7	61.86	61.92	62	68.02	68.91	69.61	70.1	70.17	70.26	71.23	71.39	72.18	72.88	73.76	80.48	97.09	97.43	101.88	A	A	A	A	A	B	C	B	A	A	A	A	A	C	B	B	B	B	CASPER
196	O-a-D-Mannopyranosyl-(1→2)-O-a-D-mannopyranosyl-(1→2)-a-L-fucose	0	0	0	0	0	16.19	61.95	61.99	66.86	67.8	67.87	69.17	70.87	70.99	71.33	72.84	74.13	74.16	77.95	79.05	92.5	102.15	102.99	A	A	A	A	A	E	C	C	A	A	A	A	A	C	E	C	B	B	CASPER
197	Methyl O-a-D-mannopyranosyl-(1→6)-O-b-D-galactopyranosy-(1→4)-a-L-fucopyranoside	0	0	0	0	16.11	56.08	61.92	66.47	67.4	67.76	69.34	69.67	69.83	70.95	71.64	72.11	73.65	73.79	74.37	81.97	100.42	100.49	104.7	A	B	A	D	C	E	B	C	A	A	A	A	D	C	B	C	C	B	CASPER
198	O-a-L-Rhamnopyranosyl-(1→6)-O-b-D-galactopyranosyl-(1→4)-a-L-fucose	0	0	0	0	0	15.64	17.39	67.23	67.67	69.6	69.61	69.63	69.96	71.32	71.74	71.84	73.11	73.54	74.85	82.52	93.23	101.54	104.56	A	B	A	D	C	E	B	D	A	A	A	A	C	C	E	E	C	B	CASPER
199	Methyl O-b-D-mannopyranosyl-(1→6)-O-a-D-N-Acetyl galactosaminepyranosy-(1→4)-a-L-fucopyranoside	0	0	16.84	22.91	51.76	56.03	62.04	67.11	67.88	68.6	69.33	69.5	69.51	71.28	71.43	71.52	73.97	77.18	82.85	100.4	100.78	101.48	175.43	B	A	A	D	C	E	B	C	A	A	A	A	D	C	E	B	D	A	CASPER
200	Methyl O-b-L-N-acetyl rhamnosaminepyranosyl-(1→6)-O-a-D-galactopyranosy-(1→4)-a-L-fucopyranoside	0	0	16.84	17.04	22.98	53.71	56.03	67.11	68.95	69.51	69.91	70	70.13	70.48	71.43	72.67	72.72	73.15	82.85	100.28	100.4	102.09	176.39	B	A	A	D	C	E	B	D	A	A	A	A	D	C	E	B	D	A	CASPER
201	Methyl O-b-L-N-acetyl rhamnosaminepyranosyl-(1→6)-O-a-D-N-Acetyl galactosaminepyranosy-(1→6)-a-D-glucopyranoside	17.04	22.91	22.98	51.04	53.71	56.09	66.92	68.38	69.12	69.64	69.84	70.67	71.03	72.19	72.67	72.72	73.15	74.31	97.95	100.24	100.28	175.43	176.39	B	A	A	D	D	A	B	D	A	B	A	B	D	D	E	B	D	A	CASPER
202	Methyl O-b-L-N-acetyl rhamnosaminepyranosyl-(1→6)-O-a-D-galactopyranosy-(1→6)-b-D-glucopyranoside	0	0	17.04	22.98	53.71	57.95	66.83	69	69.21	69.75	70.1	70.3	70.53	72.67	72.72	73.15	73.99	75.18	76.94	99.17	100.28	104.23	176.39	B	A	B	D	D	A	B	D	A	B	A	B	D	D	A	B	D	A	CASPER
203	Methyl O-b-L-rhamnopyranosyl-(1→6)-O-a-D-mannopyranosy-(1→6)-b-D-mannopyranoside	0	0	0	0	17.46	57.76	66.6	67.5	67.5	69.03	70.74	70.98	71.05	71.3	72.4	72.7	72.9	73.73	73.87	75.25	100.39	100.78	101.94	B	A	B	D	D	C	C	D	A	A	A	A	D	D	B	C	C	B	CASPER
204	Methyl O-b-L-N-acetyl rhamnosaminepyranosyl-(1→6)-O-a-D-mannopyranosy-(1→6)-b-D-galactopyranoside	0	0	17.01	22.98	53.79	57.91	66.72	67.56	69.15	69.5	70.89	71.44	71.62	72.45	72.66	72.7	73.15	74	74.29	100.14	100.58	104.79	176.39	B	A	B	D	D	B	C	D	A	B	A	B	D	D	A	B	D	A	CASPER

## Sheet: TABLE S4
TABLE S4. Data set, classification of the anomeric configurations, type of linkages, residues and chain type of 69 di- and trisaccharides
	and RF di- and trisaccharide predictions for the tes set using 1D 13C NMR descriptors.
		Spectral 13C NMR descriptors																							Classification									RF trisaccharides predictions
ID	Chemical name	C1	C2	C3	C4	C5	C6	C7	C8	C9	C10	C11	C12	C13	C14	C15	C16	C17	C18	C19	C20	C21	C22	C23	Ano_F	Ano_S	Ano_R	F_Link	S_Link	Red_end	M_residue	F_Residue	Chain_Type	Ano_F	Ano_S	Ano_R	F_Link	S_Link	Red_end	M_residue	F_Residue	Chain_Type	References
1	4-O-b-D-Glucopyranosyl-a-D-glucose	0	0	0	0	0	0	0	0	0	0	0	60.74	61.41	70.28	70.92	72.04	72.15	73.97	76.31	76.8	79.56	92.63	103.37	B	X	A	X	C	A	X	A	X	B	X	A	X	C	A	X	A	X	[7]
2	6-O-b-D-Glucopyranosyl-b-D-glucose	0	0	0	0	0	0	0	0	0	0	0	62.5	70.2	71.1	71.1	74.5	75.5	76.1	77.1	77.1	77.1	97.2	103.8	B	X	B	X	D	A	X	A	X	B	X	B	X	D	A	X	A	X	[7]
3	6-O-a-D-Glucopyranosyl-a-D-glucose	0	0	0	0	0	0	0	0	0	0	0	61.7	67	70.8	70.8	71.3	72.8	72.8	73.1	74.4	74.4	93.5	99.3	A	X	A	X	D	A	X	A	X	A	X	A	X	D	C	X	A	X	[7]
4	3-O-a-D-Glucopyranosyl-b-D-glucose	0	0	0	0	0	0	0	0	0	0	0	61.5	61.6	70.4	71.1	72.8	72.8	74	74	76.7	83.2	97	100.1	A	X	B	X	B	A	X	A	X	A	X	B	X	C	A	X	A	X	[7]
5	2-O-a-D-Glucopyranosyl-a-D-glucose	0	0	0	0	0	0	0	0	0	0	0	62	62	71.1	71.1	73.1	73.1	73.1	73.1	74.4	77.1	90.8	97.5	A	X	A	X	A	A	X	A	X	A	X	A	X	C	A	X	A	X	[7]
6	3-O-b-D-Mannopyranosyl-D-b-mannose	0	0	0	0	0	0	0	0	0	0	0	62.3	62.7	66.8	69.4	71.9	73.2	76.7	77.8	78.4	81.1	98.7	101.6	B	X	B	X	B	C	X	C	X	B	X	B	X	B	C	X	C	X	[7]
7	4-O-b-D-Mannopyranosyl-D-b-mannose	0	0	0	0	0	0	0	0	0	0	0	62	62	68.2	72	72	73.1	74.3	76.2	77.8	78.2	95.3	101.6	B	X	B	X	C	C	X	C	X	B	X	B	X	C	C	X	C	X	[7]
8	4-O-b-D-Mannopyranosyl-D-a-mannose	0	0	0	0	0	0	0	0	0	0	0	62	62	68.2	70.4	71.7	72	72.3	74.3	77.8	77.8	95.3	101.6	B	X	A	X	C	C	X	C	X	B	X	B	X	A	C	X	C	X	[7]
9	4-O-b-D-glucopyranosyl-b-D-mannose	0	0	0	0	0	0	0	0	0	0	0	62	62	71.2	71.9	73.4	74.7	76.5	77.1	77.6	78.5	95.3	104.2	B	X	B	X	C	C	X	A	X	B	X	B	X	C	A	X	A	X	[7]
10	4-O-b-D-glucopyranosyl-a-D-mannose	0	0	0	0	0	0	0	0	0	0	0	62	62	70.6	71.2	71.9	72.6	74.7	77.1	77.6	78.5	95.3	104.2	B	X	A	X	C	C	X	A	X	B	X	A	X	C	A	X	A	X	[7]
11	4-O-b-D-Mannopyranosyl-D-b-glucose	0	0	0	0	0	0	0	0	0	0	0	62	62	68.4	72.3	74.6	75.6	75.9	76.2	78.1	80.5	97.5	101.7	B	X	B	X	C	A	X	C	X	B	X	B	X	C	A	X	A	X	[7]
12	4-O-b-D-Mannopyranosyl-D-a-glucose	0	0	0	0	0	0	0	0	0	0	0	62	62	68.4	71.7	72.3	72.3	73	74.6	78.1	80.5	93.5	101.7	B	X	A	X	C	A	X	C	X	A	X	A	X	C	C	X	C	X	[7]
13	4-O-b-D-Galactopyranosyl-b-D-glucose	0	0	0	0	0	0	0	0	0	0	0	61.11	62.03	69.54	71.95	73.54	74.84	75.34	75.63	76.2	79.21	96.62	103.69	B	X	B	X	C	A	X	B	X	B	X	B	X	C	A	X	A	X	[7]
14	4-O-b-D-Galactopyranosyl-a-D-glucose	0	0	0	0	0	0	0	0	0	0	0	60.98	62.03	69.54	70.98	71.95	72.18	72.37	73.54	76.2	79.32	92.71	103.63	B	X	A	X	C	A	X	B	X	A	X	A	X	A	A	X	A	X	[7]
15	Methyl 4-O-a-D-glucopyranosyl-b-D-glucopyranoside	0	0	0	0	0	0	0	0	0	0	57.87	61.6	61.77	70.41	72.64	73.61	73.84	73.84	75.56	77.05	78.3	100.58	103.99	A	X	B	X	C	A	X	A	X	A	X	B	X	C	A	X	A	X	[7]
16	Methyl 6-O-b-D-glucopyranosyl-b-D-glucopyranoside	0	0	0	0	0	0	0	0	0	0	58.05	61.83	69.52	70.59	70.67	73.93	74.02	75.84	76.72	76.72	76.78	103.64	104.18	B	X	B	X	D	A	X	A	X	B	X	B	X	D	A	X	A	X	[7]
17	Methyl 3-O-b-D-glucopyranosyl-a-D-glucopyranoside	0	0	0	0	0	0	0	0	0	0	55.92	61.64	61.71	69.13	70.58	71.61	72.35	74.42	76.6	76.89	83.74	100.04	103.67	B	X	A	X	B	A	X	A	X	B	X	A	X	B	A	X	A	X	[7]
18	Methyl 2-O-b-D-glucopyranosyl-b-D-glucopyranoside	0	0	0	0	0	0	0	0	0	0	57.71	61.74	61.74	70.54	70.54	74.58	76.63	76.63	76.79	76.93	81.28	102.73	103.38	B	X	B	X	A	A	X	A	X	B	X	B	X	A	A	X	A	X	[7]
19	Methyl 2-O-a-D-glucopyranosyl-a-D-glucopyranoside	0	0	0	0	0	0	0	0	0	0	55.75	61.56	61.63	70.54	70.66	72.26	72.38	72.47	72.85	73.76	76.86	97.43	97.57	A	X	A	X	A	A	X	A	X	A	X	A	X	A	A	X	A	X	[7]
20	Methyl 3-O-a-D-glucopyranosyl-a-D-galactopyranoside	0	0	0	0	0	0	0	0	0	0	55.97	61.55	62.03	66.6	67.54	70.58	71.31	72.2	72.74	73.84	75.6	96.04	100.36	A	X	A	X	B	B	X	A	X	A	X	A	X	B	B	X	A	X	[7]
21	Methyl 3-O-b-D-glucopyranosyl-a-D-galactopyranoside	0	0	0	0	0	0	0	0	0	0	55.91	61.64	61.98	68.21	69.86	70.51	71.24	74.36	76.62	76.72	80.32	100.25	104.43	B	X	A	X	B	B	X	A	X	B	X	A	X	B	B	X	A	X	[7]
22	Methyl 4-O-a-D-glucopyranosyl-a-D-galactopyranoside	0	0	0	0	0	0	0	0	0	0	56.09	61.37	61.42	69.42	70.13	70.51	71.92	72.69	73.05	73.67	79.7	100.4	101.06	A	X	A	X	C	B	X	A	X	A	X	A	X	C	A	X	A	X	[7]
23	Methyl 4-O-b-D-glucopyranosyl-a-D-galactopyranoside	0	0	0	0	0	0	0	0	0	0	56.05	61.8	61.8	69.64	70.66	70.86	70.99	74.69	76.8	76.8	79.18	100.37	104.62	B	X	A	X	C	B	X	A	X	B	X	A	X	C	A	X	A	X	[7]
24	Methyl 6-O-a-D-glucopyranosyl-a-D-galactopyranoside	0	0	0	0	0	0	0	0	0	0	56.08	61.63	67.64	69.15	69.49	70.24	70.4	70.63	72.24	72.82	74.05	99.03	100.36	A	X	A	X	D	B	X	A	X	A	X	A	X	D	B	X	A	X	[7]
25	Methyl 6-O-a-D-glucopyranosyl-b-D-galactopyranoside	0	0	0	0	0	0	0	0	0	0	57.84	61.61	67.5	69.72	70.61	71.61	72.26	72.81	73.75	73.88	74.03	99.1	104.65	A	X	B	X	D	B	X	A	X	A	X	A	X	D	A	X	A	X	[7]
26	Methyl 6-O-b-D-glucopyranosyl-a-D-galactopyranoside	0	0	0	0	0	0	0	0	0	0	56.27	61.89	69.12	69.85	70.2	70.28	70.3	70.74	74.09	76.76	76.81	100.47	103.57	B	X	A	X	D	B	X	A	X	B	X	A	X	D	B	X	A	X	[7]
27	Methyl 6-O-b-D-glucopyranosyl-b-D-galactopyranoside	0	0	0	0	0	0	0	0	0	0	57.95	61.89	69.7	69.7	70.74	71.58	73.7	74.05	74.65	76.79	76.83	103.55	104.68	B	X	B	X	D	B	X	A	X	B	X	B	X	D	A	X	A	X	[7]
28	Methyl 2-O-a-D-glucopyranosyl-a-D-mannopyranoside	0	0	0	0	0	0	0	0	0	0	55.72	61.72	61.94	68.17	70.69	71.53	72.73	73.25	73.46	73.82	80.18	100.38	101.69	A	X	A	X	A	C	X	A	X	A	X	A	X	A	A	X	A	X	[7]
29	Methyl 2-O-a-D-glucopyranosyl-b-D-mannopyranoside	0	0	0	0	0	0	0	0	0	0	57.62	61.4	62.05	68.54	70.4	72.67	73.02	74.02	74.62	77.35	78.8	101.13	101.72	A	X	B	X	A	C	X	A	X	A	X	B	X	A	A	X	A	X	[7]
30	Methyl 2-O-b-D-glucopyranosyl-a-D-mannopyranoside	0	0	0	0	0	0	0	0	0	0	55.68	61.56	61.64	68.05	70.49	70.68	73.44	73.65	76.44	76.88	78.39	99.86	102.66	B	X	A	X	A	C	X	A	X	B	X	B	X	A	A	X	A	X	[7]
31	Methyl 2-O-b-D-glucopyranosyl-b-D-mannopyranoside	0	0	0	0	0	0	0	0	0	0	57.78	61.63	61.87	68.37	70.46	73.04	74.36	76.4	76.82	77.33	79.23	102.07	104.16	B	X	B	X	A	C	X	A	X	B	X	B	X	A	A	X	A	X	[7]
32	Methyl 2-O-a-D-Mannopyranosyl-a-D-glucose	0	0	0	0	0	0	0	0	0	0	55.67	61.61	61.84	67.64	70.59	71.15	71.26	72.37	72.55	73.75	75.94	97.27	98.46	A	X	A	X	A	A	X	C	X	A	X	A	X	A	A	X	A	X	[7]
33	Methyl 2-O-a-D-Mannopyranosyl-b-D-glucose	0	0	0	0	0	0	0	0	0	0	58	61.84	61.84	67.67	70.82	71.16	71.36	73.7	75.45	76.66	78.97	100.59	104.6	A	X	B	X	A	A	X	C	X	A	X	B	X	A	A	X	C	X	[7]
34	Methyl 2-O-b-D-Mannopyranosyl-b-D-glucose	0	0	0	0	0	0	0	0	0	0	57.7	61.78	61.97	67.88	70.61	71.37	73.92	76.68	76.68	77.26	80.65	101.04	103	B	X	B	X	A	A	X	C	X	B	X	B	X	A	A	X	C	X	[7]
35	Methyl 3-O-a-D-Mannopyranosyl-b-D-glucose	0	0	0	0	0	0	0	0	0	0	57.88	61.66	61.8	67.69	70.95	71.22	71.42	72.77	73.74	76.56	83.39	101.62	104.14	A	X	B	X	B	A	X	C	X	A	X	B	X	B	A	X	A	X	[7]
36	Methyl 3-O-b-D-Mannopyranosyl-b-D-glucose	0	0	0	0	0	0	0	0	0	0	57.88	61.83	61.94	67.72	69.25	71.4	73.5	73.88	76.39	77.21	85.59	101.3	103.95	B	X	B	X	B	A	X	C	X	B	X	B	X	B	A	X	C	X	[7]
37	Methyl 2-O-b-D-galactopyranosyl-a-D-glucopyranoside	0	0	0	0	0	0	0	0	0	0	56.1	62	62.2	70	71	72.4	72.7	73.5	74.1	76.3	81.5	100.3	105.6	B	X	A	X	A	A	X	B	X	A	X	B	X	A	A	X	A	X	[7]
38	Methyl 3-O-b-D-galactopyranosyl-b-D-glucopyranoside	0	0	0	0	0	0	0	0	0	0	58.3	62.2	62.2	69.7	69.9	72.6	73.9	74	76.6	76.8	86.3	104.3	104.6	B	X	B	X	B	A	X	B	X	B	X	B	X	B	A	X	A	X	[7]
39	Methyl 2-O-a-D-mannopyranosyl-a-D-mannopyranoside	0	0	0	0	0	0	0	0	0	0	55.7	61.8	61.9	67.8	67.8	70.8	71.7	71.7	73.4	74.1	79.3	100.1	103	A	X	A	X	A	C	X	C	X	A	X	A	X	B	C	X	C	X	[7]
40	Methyl 3-O-a-D-mannopyranosyl-a-D-mannopyranoside	0	0	0	0	0	0	0	0	0	0	55	61.1	61.1	66.4	67	69.8	70.3	70.6	73	73.6	78.5	101	102.6	A	X	A	X	B	C	X	C	X	A	X	A	X	B	B	X	C	X	[7]
41	Methyl 4-O-a-D-mannopyranosyl-a-D-mannopyranoside	0	0	0	0	0	0	0	0	0	0	55	61.3	61.3	70.7	70.7	70.7	71.4	71.4	71.4	74	74.5	101	101.8	A	X	A	X	C	C	X	C	X	A	X	A	X	C	A	X	A	X	[7]
42	Methyl 6-O-a-D-mannopyranosyl-a-D-mannopyranoside	0	0	0	0	0	0	0	0	0	0	55.7	61.8	66.5	67.4	67.7	70.8	70.8	71.5	71.5	71.6	73.6	100.3	101.8	A	X	A	X	D	C	X	C	X	A	X	A	X	D	C	X	C	X	[7]
43	Methyl a-D-mannopyranosyl-(1→2)-[a-D-mannopyranosyl-(1→3)]-b-D-glucopyranoside	0	0	0	0	58.1	62	62.2	62.3	68.1	68.2	71.2	71.2	71.5	71.5	71.5	74.5	74.5	76.5	76.9	79.2	100.4	100.7	104.7	A	A	B	A	B	A	C	C	B	A	A	B	A	C	C	C	B	B	[20]
44	Methyl a-D-mannopyranosyl-(1→2)-[a-D-mannopyranosyl-(1→3)]-b-D-glucopyranoside	0	0	0	0	56	61.7	62.2	62.4	68.3	68.3	71.2	71.2	71.7	71.7	71.9	72.9	73.6	74.4	74.4	76.3	96.9	97.9	101.3	A	A	A	A	B	A	C	C	B	A	A	B	B	C	B	C	B	B	[20]
45	Methyl b-D-galactopyranosyl-(1→2)-[b-D-galactopyranosyl-(1→3)]-a-D-glucopyranoside	0	0	0	0	56.1	62	62.2	62.3	69.8	70	70	72.4	72.4	72.7	74.3	74.3	76.3	76.5	80.7	82	100.2	104.2	105.2	B	B	A	A	B	A	B	B	B	B	B	B	A	B	A	B	B	B	[20]
46	Methyl a-L-rhamnopyranosyl-(1→2)-[b-D-galactopyranosyl-(1→3)]-b-D-glucopyranoside	0	0	0	0	17.6	58.3	62.2	62.2	69.7	69.9	70	71.5	71.7	72.2	73.4	74.1	76.4	76.6	80.7	85.9	102.7	103.6	104.3	A	B	B	A	B	A	B	D	B	B	B	B	A	B	A	B	B	B	[20]
47	Methyl b-L-fucopyranosyl-(1→2)-[b-D-galactopyranosyl-(1→3)]-b-D-glucopyranoside	0	0	0	0	16.4	58.6	62	62.2	69.7	70.1	72.1	72.3	72.5	72.6	73.5	74.1	76.4	76.6	80	86.1	104.1	104.6	105.7	B	B	B	A	B	A	B	E	B	B	B	B	A	B	A	A	E	B	[20]
48	Methyl b-D-galactopyranosyl-(1→2)-[a-L-fucopyranosyl-(1→3)]-b-D-glucopyranoside	0	0	0	0	16.5	62	62.2	68.3	69.5	70	70	70.9	72.8	73.2	74	76.5	76.8	81.8	83.6	100.7	103.8	104	58.4	B	A	B	A	B	A	E	B	B	A	B	B	C	D	A	B	B	A	[20]
49	Methyl a-L-rhamnopyranosyl-(1→2)-[a-L-rhamnopyranosyl-(1→3)]-b-D-glucopyranoside	0	0	0	0	17.7	17.7	58.3	62.2	69.8	70.1	70.3	71.7	71.7	71.8	71.9	73.2	73.3	76.9	81.7	85.2	102.7	102.7	103.4	A	A	B	A	B	A	D	D	B	A	A	B	A	B	A	D	D	B	[20]
50	Methyl b-D-galactopyranosyl-(1→2)-[b-L-fucopyranosyl-(1→3)]-b-D-glucopyranoside	0	0	0	0	16.6	58.4	62	62.1	69.8	71.2	72.6	72.6	72.8	73	73.6	74.2	76.5	76.6	81.8	85.1	103.9	105.3	105.8	B	B	B	A	B	A	E	B	B	B	B	B	A	B	A	A	A	B	[20]
51	Methyl a-D-mannopyranosyl-(1→2)-[b-L-rhamnopyranosyl-(1→3)]-b-D-glucopyranoside	0	0	0	0	17.9	58.4	62.4	62.6	68.1	70.1	70.4	71.6	71.8	71.8	72	73.4	75	77.1	79.6	82.3	101.5	102.7	104.8	A	B	B	A	B	A	D	C	B	A	A	B	A	B	A	C	D	B	[20]
52	Methyl a-L-rhamnopyranosyl-(1→2)-[a-L-rhamnopyranosyl-(1→3)]-a-D-glucopyranoside	0	0	0	0	17.8	17.8	56.2	61.9	69.6	70.1	70.5	71.7	71.7	71.7	71.7	72.7	73.3	73.3	80.2	82	99.8	102.5	103.8	A	A	A	A	B	A	D	D	B	A	A	A	A	C	D	D	D	B	[20]
53	Methyl a-L-fucopyranosyl-(1→2)-[b-L-fucopyranosyl-(1→3)]-a-D-glucopyranoside	0	0	0	0	16.7	16.7	56.2	61.8	68.6	70	71.1	71.6	72.6	72.6	72.6	72.6	73.1	74.3	80.3	82	100.2	102.8	105.4	A	B	A	A	B	A	E	E	B	B	B	A	A	B	A	E	E	B	[20]
54	O-b-D-Mannopyranosyl-(1→4)-O-b-D-mannpyranosyl-(1→4)-a-D-mannose	0	0	0	0	0	62	62	62.4	68.2	70.4	71.4	71.9	71.9	72.4	73	74.3	76.5	77.9	77.9	77.9	95.2	101.6	101.6	B	B	A	C	C	C	C	C	A	B	B	A	C	C	C	C	C	A	[21]
55	O-b-D-Mannopyranosyl-(1→4)-O-b-D-mannpyranosyl-(1→4)-b-D-glucose	0	0	0	0	0	62	62	62.4	68.4	71.5	72	73	74.3	75.3	75.7	76.1	76.5	77.9	77.9	80.6	97.3	101.5	101.7	B	B	B	C	C	A	C	C	A	B	B	B	C	C	A	A	C	A	[21]
56	Methyl a-D-glucopyranosyl-(1→3)-[a-D-glucopyranosyl-(1→4)]-a-D-galactopyranoside	0	0	0	0	56.04	61.53	61.64	61.8	67.99	70.54	70.54	71.95	72.62	72.76	72.84	73.52	73.62	74.21	75.71	77.8	96.88	100.42	101.4	A	A	A	B	C	B	A	A	B	B	A	A	B	C	B	A	A	B	[21]
57	Methyl b-L-fucopyranosyl-(1→3)-[a-L-fucopyranosyl-(1→4)]-a-D-galactopyranoside	0	0	0	0	16.1	16.17	55.97	62.24	68.01	68.07	69.54	70.47	71.48	71.9	72.15	72.19	72.63	73.91	75.4	79.1	100.1	100.46	102.26	B	A	A	B	C	B	E	E	B	A	A	A	B	C	B	E	E	B	[22]
58	Methyl b-L-fucopyranosyl-(1→3)-[b-L-fucopyranosyl-(1→4)]-a-D-galactopyranoside	0	0	0	0	16.16	16.39	55.98	61.15	67.92	71.56	71.87	71.94	72.01	72.17	72.22	72.26	73.8	73.91	74.76	77.84	99.96	102.56	103.75	B	B	A	B	C	B	E	E	B	B	B	A	B	C	B	E	E	B	[22]
59	O-a-D-Glucopyranosyl-(1→4)-O-a-D-glucpyranosyl-(1→4)-a-D-glucose	0	0	0	0	0	62.4	62.4	62.4	71.2	71.6	72.7	73.1	73.4	73.4	74.3	74.7	74.7	75.1	78.5	78.5	93.4	101.1	101.1	A	A	A	C	C	A	A	A	A	A	A	B	D	C	A	A	A	A	[23]
60	O-a-D-Glucopyranosyl-(1→4)-O-a-D-glucpyranosyl-(1→4)-b-D-glucose	0	0	0	0	0	62.4	62.4	62.4	71.2	72.7	73.1	73.4	74.3	74.7	75.1	75.9	76.3	77.8	78.5	78.9	97.1	101.1	101.1	A	A	B	C	C	A	A	A	A	B	B	B	D	C	A	A	A	A	[23]
61	O-b-D-Glucopyranosyl-(1→6)-O-b-D-glucpyranosyl-(1→6)-a-D-glucose	0	0	0	0	0	62.4	70	70.2	71	71.2	71.2	71.2	73.1	74.3	74.6	74.6	76.1	77.1	77.1	77.1	93.4	103.7	103.7	B	B	A	D	D	A	A	A	A	B	B	B	D	D	A	A	A	A	[23]
62	Methyl b-D-glucopyranosyl-(1→2)-[b-D-glucopyranosyl-(1→3)]-b-D-mannopyranoside	0	0	0	0	55.77	61.52	61.57	61.63	66	70.42	70.52	73.39	73.66	74.06	74.96	76.47	76.66	76.85	76.89	77.55	99.62	100.97	102.53	B	B	B	A	B	C	A	A	B	B	B	B	B	C	B	A	A	B	[24]
63	Methyl a-D-glucopyranosyl-(1→3)-[b-D-fucopyranosyl-(1→4)]-a-D-galactopyranoside	0	0	0	0	16.2	56.06	61.11	61.54	67.76	70.45	71.82	71.94	72.12	72.24	72.24	72.67	72.93	73.8	74.18	74.59	96.01	100.26	103.7	A	B	A	B	C	B	E	A	B	B	A	A	B	C	B	E	E	B	[25]
64	Methyl b-D-glucopyranosyl-(1→3)-[a-D-fucopyranosyl-(1→4)]-a-D-galactopyranoside	0	0	0	0	16.14	55.98	61.75	62.23	68.03	68.49	69.57	70.48	70.7	71.87	72.65	74.41	76.58	76.72	77.32	80.69	100.2	100.24	104.92	B	A	A	B	C	B	E	A	B	A	A	A	B	C	B	A	E	B	[25]
65	Methyl a-L-rhamnopyranosyl-(1→3)-[a-L-rhamnopyranosyl-(1→4)]-a-L-rhamnopyranoside	0	0	0	0	17.8	18	18.7	56.3	68.8	70.6	70.9	71.4	71.9	72	72.1	72.1	73.3	73.5	80.1	81.5	102.1	103.2	103.8	A	A	A	B	C	D	D	D	B	A	A	A	B	C	D	D	D	B	[25]
66	Methyl b-L-fucopyranosyl-(1→3)-[b-D-glucopyranosy-(1→4)]-a-L-rhamnopyranoside	0	0	0	0	16.6	18.3	56.1	62.1	68.9	68.9	71	71.8	72.5	72.6	74.3	75.25	77.2	77.2	79	80.9	101.6	102.3	105.1	B	B	A	B	C	D	A	E	B	B	B	A	B	C	D	E	A	B	[26]
67	Methyl O-b-D-mannopyranosyl-(1→2)-O-a-D-mannopyranosyl-(1→2)-a-D-mannopyranoside	0	0	0	0	55.62	61.7	61.82	61.83	67.61	67.9	68.11	70.56	71.09	71.57	73.45	73.69	74.2	77.13	77.99	79.16	99.47	100.22	100.78	B	A	A	A	A	C	C	C	A	A	A	A	A	C	C	C	B	B	[26]
68	O-b-D-N-Acetyl glucosaminepyranosyl-(1→6)-O-b-D-galactopyranosyl-(1→4)-b-D-glucose	0	0	0	25.019	58.196	62.749	63.382	70.94	71.136	72.564	73.515	75.059	76.231	76.492	76.563	77.049	77.408	78.544	81.651	98.416	103.752	105.697	177.356	B	B	B	D	C	A	B	A	A	B	B	A	D	C	A	B	A	A	[27]
69	O-b-D-N-acetyl glucosaminepyranosyl-(1→6)-O-b-D-galactopyranosyl-(1→4)-a-D-glucose	0	0	0	0	0	62.7	63.65	71.14	71.31	71.67	72.68	73.48	73.48	73.71	74.3	75.12	75.29	76.64	77.75	81.9	94.98	105.77	106.01	B	B	A	D	C	A	B	A	A	B	B	B	D	C	A	B	A	A	[27]
